1 **Mapping the steroid response to major trauma from injury to recovery: a prospective cohort study**

2 Mark A. Foster<sup>1,2</sup>, Angela E. Taylor<sup>3,4</sup>, Neil E. Hill<sup>5</sup>, Conor Bentley<sup>1,2</sup>, Jon Bishop<sup>1,2</sup>, Lorna C. Gilligan<sup>3,4</sup>, Fozia  
3 Shaheen<sup>3,4</sup>, Julian F. Bion<sup>6</sup>, Joanne L. Fallowfield<sup>7</sup>, David R. Woods<sup>2,8</sup>, Irina Bancos<sup>9</sup>, Mark M. Midwinter<sup>10</sup>, Janet  
4 M. Lord<sup>11,11,12\*</sup>, Wiebke Arlt<sup>3,4,12\*</sup>

5 \* equal senior authors

6 <sup>1</sup>NIHR-Surgical Reconstruction and Microbiology Research Centre, Queen Elizabeth Hospital Birmingham,  
7 University Hospitals Birmingham NHS Foundation Trust, Birmingham, B15 2WB, UK; <sup>2</sup>Royal Centre for Defence  
8 Medicine, Queen Elizabeth Hospital Birmingham, B15 2TH, UK; <sup>3</sup>Institute of Metabolism and Systems Research,  
9 University of Birmingham, Birmingham, B15 2TT, UK; <sup>4</sup>Centre for Endocrinology, Diabetes and Metabolism,  
10 Birmingham Health Partners, University of Birmingham, Birmingham, B15 2TH, UK <sup>5</sup>Section of Investigative  
11 Medicine, Imperial College London, W12 0NN, UK; <sup>6</sup>Intensive Care Medicine, Queen Elizabeth Hospital,  
12 University Hospitals Birmingham NHS Foundation Trust, Birmingham, UK; <sup>7</sup>Institute of Naval Medicine,  
13 Alverstoke, Hants., UK; <sup>8</sup>Leeds Beckett University, Leeds, UK; <sup>9</sup>Division of Endocrinology, Metabolism and  
14 Nutrition, Department of Internal Medicine, Mayo Clinic, Rochester, Minnesota, USA; <sup>10</sup>School of Biomedical  
15 Sciences, University of Queensland, Brisbane, Australia; <sup>11</sup>MRC-ARUK Centre for Musculoskeletal Ageing  
16 Research, Institute of Inflammation and Ageing, University of Birmingham, Birmingham, B15 2TT, UK; <sup>12</sup>NIHR  
17 Birmingham Biomedical Research Centre, University Hospitals Birmingham NHS Foundation Trust and  
18 University of Birmingham, Birmingham, B15 2GW, UK

19 **Corresponding author:**

20 Lt Col Mark Anthony Foster, Academic Department of Military Surgery and Trauma, Royal Centre for Defence  
21 Medicine, ICT Centre, Birmingham, B15 2SQ  
22 [m.foster@bham.ac.uk](mailto:m.foster@bham.ac.uk) Tel: +47970 444328

23 **Word Count:** 3906

24 **Short title:** The steroid response to major trauma

25 **Keywords:** major trauma; systemic inflammatory response syndrome; stress response; steroids; DHEA;  
26 testosterone.

27 **Funding:** The SIR Study was part of the Surgeon General's Casualty Nutrition Study (SGCNS), a Ministry of  
28 Defence funded project. Additional funding and support was provided by University Hospitals Birmingham NHS  
29 Foundation Trust, University of Birmingham. the National Institute for Health Research (NIHR) Surgical  
30 Reconstruction and Microbiology Research Centre (SRMRC) and the Drummond Trust Foundation. WA and JML  
31 receive support from the NIHR Birmingham Biomedical Research Centre (Grant Reference Number BRC-1215-  
32 20009).

33 **Disclosure statement:** The authors have nothing to disclose. The views expressed are those of the authors and  
34 not necessarily those of the NIHR or the Department of Health and Social Care UK.

35 **Abstract**

36 **Context:** Survival rates after severe injury are improving, but complication rates and outcomes are variable.

37 **Objective:** This cohort study addressed the lack of longitudinal data on the steroid response to major trauma and  
38 during recovery.

39 **Design:** We undertook a prospective, observational cohort study from time of injury to six months post-injury at  
40 a major UK trauma centre and a military rehabilitation unit, studying patients within 24 hours of major trauma  
41 (estimated New Injury Severity Score (NISS) >15).

42 **Main outcome measures:** We measured adrenal and gonadal steroids in serum and 24-h urine by mass  
43 spectrometry, assessed muscle loss by ultrasound and nitrogen excretion, and recorded clinical outcomes  
44 (ventilator days, length of hospital stay, opioid use, incidence of organ dysfunction and sepsis); results were  
45 analysed by generalized mixed-effect linear models.

46 **Findings:** We screened 996 multiple injured adults, approached 106, and recruited 95 eligible patients; 87  
47 survived. We analysed all male survivors <50 years not treated with steroids (N=60; median age 27 [interquartile  
48 range 24-31] years; median NISS 34 [29-44]). Urinary nitrogen excretion and muscle loss peaked after one and  
49 six weeks, respectively. Serum testosterone, dehydroepiandrosterone and dehydroepiandrosterone sulfate  
50 decreased immediately after trauma and took two, four and more than six months, respectively, to recover; opioid  
51 treatment delayed dehydroepiandrosterone recovery in a dose-dependent fashion. Androgens and precursors  
52 correlated with SOFA score and probability of sepsis.

53 **Conclusion:** The catabolic response to severe injury was accompanied by acute and sustained androgen  
54 suppression. Whether androgen supplementation improves health outcomes after major trauma requires further  
55 investigation.

56 **Précis**

57 A cohort study in male survivors of major trauma revealed acute and sustained androgen suppression and protein  
58 catabolism including muscle loss. Serum androgens correlated with probability of sepsis.

## 59 INTRODUCTION

60 Over 5 million people worldwide die each year from serious injury (1), with almost 25% caused by road  
61 traffic collisions (RTC) (2). In England alone, there are 5400 trauma deaths and 20,000 severe injuries treated by  
62 the National Health Service annually (3). Since 2012, the establishment of 22 trauma centres in England has been  
63 accompanied by a 19% improvement in survival odds following injury (4). During this time, the UK also received  
64 severely injured military trauma patients from the conflict in Afghanistan (5,6).

65 Improvements in short-term outcomes have been achieved through early resuscitation and acute care (7),  
66 often informed by approaches pioneered on the battlefield. However, improvement in survival is often offset  
67 during the weeks following acute major trauma by the systemic inflammatory response syndrome (SIRS), which  
68 is associated with increased risks of infection, multi-organ dysfunction or failure (MOD/MOF), and death (8,9).  
69 Simultaneously, the hypothalamic-pituitary-adrenal axis (HPA) is thought to drive a hypermetabolic and overtly  
70 catabolic response. Importantly, in this profound catabolic state, patients lose valuable lean muscle and suffer from  
71 increased rates of infection and poor wound healing. Moreover, the dynamic nature of this response, especially  
72 beyond the first few days following injury and during recovery remains poorly described and understood, limiting  
73 the evidence base for novel therapeutic interventions. Burn injury also produces an extreme inflammatory and  
74 catabolic response after injury, previously targeted by anabolic steroid analogues (10) and beta-blockade (11).  
75 The dynamic changes in endogenous glucocorticoids and their influence on adrenal steroid metabolism after severe  
76 injury are not well characterized. We know that pro-inflammatory cytokines activate the enzyme 11 $\beta$ -  
77 hydroxysteroid dehydrogenase type (11 $\beta$ -HSD1) responsible for tissue-specific activation of glucocorticoids  
78 through conversion of inactive cortisone to active cortisol (12). However, only scarce data exist on what happens  
79 to early sex steroids and their precursors during this catabolic state.

80 To address these gaps in knowledge, we have undertaken a detailed prospective study of the endocrine  
81 and metabolic response to severe injury in military and civilian populations, recruiting patients within 24 hours of  
82 major trauma and following up for the six months post-trauma. This was undertaken to identify predictive  
83 biomarkers and therapeutic targets as well as to explore the optimal timing for therapeutic interventions that could  
84 promote better recovery after severe traumatic injury.

## 85 MATERIALS AND METHODS

### 86 Study Design and Protocol

87 This prospective cohort study was conducted in the Royal Centre for Defense Medicine and the Queen  
88 Elizabeth Hospital Birmingham, a major UK trauma centre and the primary receiving facility for UK military  
89 personnel injured abroad. Military and civilian trauma patients with an estimated New Injury Severity Score  
90 (NISS) >15 were recruited (13). NISS was used to ensure those with significant extremity trauma but lower ISS  
91 were included (14). Patients with significant head injury or pre-injury neoplastic conditions were not eligible.  
92 None of the patients received etomidate during their treatment. Informed consent was obtained from personal  
93 consultees until recovering capacity. The protocol was approved by the NRES Committee South West – Frenchay  
94 11/SW/0177 and MOD REC 116/Gen/10.

95 A daily patient review allowed the injured to be clinically phenotyped. Bespoke study management  
96 software (Clinical RESearch Tool – CREST) tracked the patient and their clinical data were entered prospectively  
97 and used to calculate Acute Physiology and Chronic Health Evaluation II (APACHE II), Sequential Organ Failure  
98 Assessment (SOFA), and Simplified Acute Physiology Score (SAPS) (15,16). Sepsis was defined using Bone's  
99 criteria of an infection associated with SIRS (17), current at the time of the study.

100 Details of opioid administration were collected from the electronic health record and prescribing system  
101 (PICS) (18) on each of the study patients. The total amount of opioid given during their hospital stay was  
102 appropriately weighted and totalled with equivalence to an oral dose of 10mg morphine, adjusting for potency,  
103 delivery method and opioid preparation (19).

104 Blood and urine samples were collected within 24 hours of acute injury and at 3, 5, 10, 14, 21, 28 days  
105 and 2, 3, 4 and 6 months during recovery post-trauma. Blood sampling occurred between 0730 and 0900 hrs;  
106 serum was then separated and frozen at -80°C for batched analysis. We separately collected morning blood  
107 samples from 37 healthy age- and sex-matched controls, to provide a comparator for the steroid data.

## 108 **Assessment of Protein Catabolism**

109 As a surrogate marker for muscle mass, we undertook longitudinal measurements of muscle thickness by  
110 a well validated method using portable ultrasound as described by Campbell *et al.* (20,21). Ultrasound  
111 measurements were taken from four different muscle sites (biceps brachii, radial forearm, rectus femoris and rectus  
112 abdominis) at weekly intervals while in hospital and at 3, 4, 5 and 6 months following discharge. All ultrasound  
113 assessments were performed by two trained operators. Measurements were performed three times at each muscle  
114 site and the mean of the three measurements was recorded. The dominant arm was favoured for ultrasound  
115 assessment of muscle mass unless it was missing or unable to be measured where wounds were extensive. This  
116 non-invasive method was chosen over others such as creatine (methyl-d3) dilution (D3-creatine) (22) due to the  
117 strict dietary requirements for methyl-d3 estimation, which was not practical in the context of major trauma.  
118 Similarly, we did not undertake MRI measurement of muscle mass due to the risk associated with repeated  
119 transport of critically ill patients to scanning facilities (23).

120 Urinary urea excretion was measured and used to estimate Total Urinary Nitrogen (TUN) excretion as  
121 described by Milner *et al.* (24) [Estimated Nitrogen Excretion: Urinary Urea Excretion (mmol/l) x 0.028 x 1.25 =  
122 Total Urinary Nitrogen excretion (g/l)].

## 123 **Steroid Analysis**

124 Serum concentrations of adrenal and gonadal steroids were measured using liquid chromatography-  
125 tandem mass spectrometry (LC-MS/MS) analysis, employing a validated multi-steroid profiling method (25). In  
126 brief, serum steroids were extracted via liquid/liquid tert-butyl-methyl-ether (MTBE), evaporated, reconstituted,  
127 and analysed by LC-MS/MS for cortisol and cortisone. Serum androgens and androgen precursors (DHEA,  
128 androstenedione, testosterone) were measured following oxime derivatization (26,27). Serum DHEA sulfate  
129 (DHEAS) was measured following protein precipitation (28,29). Steroid metabolite excretion analysis in 24-h  
130 urine samples was carried out by gas chromatography-mass spectrometry (GC-MS) in selected-ion-monitoring  
131 (SIM) mode, as previously described (30).

132 Serum concentrations of sex hormone-binding globulin (SHBG) and luteinizing hormone (LH) were  
133 analysed on the Roche Modular System (Roche Diagnostics, Lewes, UK) by two-site sandwich immunoassay  
134 using electrochemiluminescence technology.

### 135 **Statistical Analysis**

136 The raw data were evaluated by analysis of variance (ANOVA). In addition, paired and unpaired Student's  
137 t-test, Chi-Square Analysis and Mann-Whitney tests were used where appropriate.

138 Generalized linear mixed-effects models (31) were used to examine the change in variables over time.  
139 Patients were included in models as random effects to account for repeat measures over time on the same  
140 individuals. Time was modelled using restricted cubic splines (32) to allow for flexible relationships (33).  
141 Severity scores were modelled as Poisson distributions due to their skewness and non-negative ranges. Plots of  
142 predicted average fixed effects with 95% confidence intervals were produced for the first four weeks and first six  
143 months post- injury as required. Analyses were conducted in R using libraries lme4, effects, rms and ggplot2.

## 144 **RESULTS**

### 145 **Patient Recruitment and Clinical Characteristics of the Final Study Cohort**

146 We screened 996 multiply injured adults. The majority of the 889 excluded patients had a NISS $\leq$ 15,  
147 others had a significant head injury as their major injury component, and two were excluded due to a pre-injury  
148 diagnosis of cancer. Of the 102 patients recruited into the study, two withdrew and re-assessment in five revealed  
149 an actual NISS  $\leq$ 15, leaving a study cohort of 95 patients (**Fig. 1A**).

150 Excluding eight fatalities and seven patients who had received steroid therapy, 80 survivors completed  
151 sample collection over 6 months. To minimize confounders, we excluded the small groups of women (n=9) and  
152 age-advanced men (n=11), leaving our final study cohort of 60 men <50 years of age (**Fig. 1B**).

153 A summary of the cohort characteristics is shown in **Fig. 2**. Median age was 27 (interquartile range (IQR)  
154 24-31) years, median NISS was 34 (IQR 29-44), and patient day-1 (=day of major trauma) APACHE II score was  
155 21 (IQR 14-25). Patients remained ventilated on the intensive care unit (ICU) for a median of 9 (IQR 5-16) days.  
156 Median length of hospital stay was 36 (IQR 19-56) days. Improvised Explosive Device (IED) (n=33; 55%) and

157 RTC (n=11; 18%) were the most common causes of injury. Twenty-five (42%) patients had at least one septic  
158 episode and most occurred in the second week (**Fig 2C**).

### 159 **Glucocorticoid Biosynthesis and Metabolism After Major Trauma**

160 Serum cortisol concentrations increased slightly after injury, peaking at 408 (IQR 249-511) nmol/L at two  
161 weeks (**Fig. 3A; Suppl. Fig. 1A**) (34). However, concentrations remained within the wide range observed in  
162 healthy controls. Serum concentrations of the inactive glucocorticoid metabolite cortisone were lower than normal  
163 after injury, and increased slowly over time, but this trend was not significant ( $p=0.08$ ) (**Fig. 3B; Suppl. Fig. 1B**)  
164 (34). The serum cortisol-to-cortisone ratio, a marker of systemic  $11\beta$ -HSD activities (**Fig. 3C**), peaked at two  
165 weeks post-injury and returned to normal at around eight weeks. Consistent with these findings, urinary steroid  
166 metabolite excretion analysis revealed an increase in glucocorticoid metabolite excretion in weeks 2, 4 and 8 after  
167 major trauma, alongside changes in steroid metabolite ratios indicative of increased systemic  $11\beta$ -HSD1 and  
168 decreased  $11\beta$ -HSD2 activities, as assessed by ( $5\alpha$ -tetrahydrocortisol + tetrahydrocortisol)/tetrahydrocortisone  
169 and cortisol- to-cortisone ratio, respectively (**Suppl. Fig. 2+3**) (34).

### 170 **Androgen Biosynthesis and Activation After Major Trauma**

171 Serum concentrations of the adrenal androgen precursor dehydroepiandrosterone (DHEA) were very low  
172 after injury ( $p<0.0001$ , compared with healthy controls) but recovered to the normal range by three months post-  
173 injury (**Fig. 3D, Suppl. Fig. 1**) (34). In contrast, its sulfate ester, DHEAS, demonstrated sustained suppression;  
174 median serum DHEAS concentrations did not recover to values within the healthy reference range, even at the end  
175 of the 6-month study period (**Fig. 3E**). Consequently, the serum DHEA-to-DHEAS ratio (**Fig. 3F**) increased by  
176 week 2 compared with controls and failed to return to normal during the 6-month study period. The serum cortisol-  
177 to-DHEAS ratio (**Fig. 3G**) increased post-injury, peaking at 2 weeks, followed by a gradual decrease, but without  
178 returning to normal by the end of the 6-month study period.

179 Serum concentrations of the androgen precursor androstenedione (**Fig. 3H**) were below the reference  
180 range immediately after injury, recovering to the mid reference range at 2 weeks post-injury. Thus, serum  
181 androstenedione concentrations recovered much faster than DHEA, suggestive of rapid downstream activation of  
182 DHEA to androstenedione.



183 Serum testosterone (**Fig. 3I, Suppl. Fig. 4A+B**) (34) was very low following injury, starting to increase  
184 after two weeks, and recovering to the healthy sex- and age-matched reference range approximately eight weeks  
185 after injury. This was mirrored by acute suppression of serum LH immediately after injury, followed by recovery  
186 to the normal range approximately 2 weeks after injury (**Suppl. Fig. 4C+D**) (34). Serum sex hormone-binding  
187 globulin (SHBG) (**Suppl. Fig. 4E+F**) (34) concentrations were subnormal immediately post-injury, but quickly  
188 returned to the healthy reference range between injury and day 7.

189 Consistent with the observed decrease in circulating androgens, 24-h urinary steroid metabolite excretion  
190 analysis revealed a steep decrease in the major androgen metabolites androsterone and etiocholanolone at 2, 4 and  
191 8 weeks (**Suppl. Fig. 4A+B**) (34). Similarly, urinary DHEA excretion, representing the sum of unconjugated  
192 DHEA and DHEA sulfate, sharply decreased to very low concentrations at 2, 4 and 8 weeks, with a transient  
193 increase in 16 $\alpha$ -hydroxylation of DHEA at 2 weeks (**Suppl. Fig. 4C+D**) (34), possibly linked to the systemic  
194 decrease in DHEA sulfation (**Fig. 3D-F**). The overall decrease in androgen production was paralleled by a  
195 profound decrease in systemic 5 $\alpha$ -reductase activity (**Suppl. Fig. 4E+F**) (34), and hence in androgen activation,  
196 as 5 $\alpha$ -reductase is responsible for converting testosterone to the most potent androgen 5 $\alpha$ -dihydrotestosterone.

### 197 **Protein Catabolism After Major Trauma**

198 The 24-hour total urinary nitrogen (TUN) excretion increased immediately after trauma, peaking at  
199 25.0 $\pm$ 16.1 g/day at the end of the first week, returning to below 15.0 g/day by week-4. The mean maximum rate  
200 of nitrogen excretion was 33.0 $\pm$ 21.3 g/day (**Fig. 4A**). The normalization of TUN excretion coincided with the  
201 gradual recovery of adrenal and gonadal androgen production (**Fig. 4B+C**).

202 The biceps brachii muscle was the most reliable site for ultrasound measurement of muscle thickness;  
203 dressings, amputations and other wounds hampered the measurements of the other muscle areas. Changes in  
204 biceps brachii muscle thickness followed a U-shaped curve after injury, reaching a nadir at 6 weeks (day-1 after  
205 trauma compared with week-6,  $p=0.001$ ). The mean muscle loss was 22.7 $\pm$ 12.5% (**Fig. 4D**). Similar to TUN,  
206 muscle thickness recovered alongside gradually increasing adrenal and gonadal androgen production (**Fig. 4E+F**).

## 207 **Clinical Course of Post-Traumatic Recovery and Serum Androgen Dynamics**

208           The relationship between adrenal and gonadal androgens and the Sequential Organ Failure Score (SOFA)  
209 and probability of sepsis are illustrated in **Fig. 5**. During the first four weeks, serum DHEA, DHEAS, and  
210 testosterone all correlated with the clinical SOFA score (autocorrelation factor (ACF) = 0·85, 0·90 and -0·79,  
211 respectively). The serum concentrations of all three steroids also showed strong associations with the probability  
212 of sepsis ( $R=-0\cdot85$ ,  $0\cdot85$  and  $-0\cdot97$  for serum DHEA, DHEAS and testosterone, respectively). SOFA score and  
213 probability of sepsis also correlated strongly with the DHEA:DHEAS ratio (autocorrelation factor (ACF) =  $-0\cdot94$   
214 and  $-0\cdot96$  respectively) and with the serum cortisol-to-DHEAS ratio, negatively for the SOFA score but positively  
215 for probability of sepsis (autocorrelation factor (ACF) =  $-0\cdot81$  and  $0\cdot89$ , respectively) (**Suppl. Fig. 5**) (34).

## 216 **Opioid administration and endocrine recovery**

217           To examine whether opioid administration affected endocrine recovery, we modelled the impact of the  
218 total cumulative in-patient opioid dose on circulating steroid concentrations during recovery from major trauma.  
219 For this purpose, we categorised patients according to cumulative opioid dose. Modelling took into account the  
220 differences in ISS, length-of-stay (LOS), ICU LOS, and SOFA score.

221           The adjusted modelling revealed a dose-dependent impact of opioid treatment, with a higher initial peak  
222 of serum cortisol and the cortisol/cortisone ratio in those on higher doses ( $\geq 3000\text{mg}$ ) while those on lower doses  
223 had initially lower serum cortisol concentrations but showed better recovery of cortisol and cortisol/cortisone 2  
224 months into the recovery period, with broad interindividual variability in those with high cumulative opioid doses  
225 (**Fig. 6**).

226           Opioid administration showed a pronounced, dose-dependent effect on adrenal and gonadal androgen  
227 production, with significantly delayed recovery of serum DHEA and DHEAS in patients on higher opioid doses  
228 ( $p=0\cdot029$ ,  $p<0\cdot001$  respectively; **Fig. 7**). By contrast, serum testosterone concentrations, which were initially  
229 equally suppressed in all cumulative dose groups, showed a much faster recovery in individuals who received  
230 higher ( $\geq 3000\text{mg}$ ) total cumulative opioid doses. However, these confidence intervals were large for these model  
231 estimates (**Fig. 7**).

## 232 **DISCUSSION**

233 In this study, we have characterized the response of adrenal and gonadal steroids and catabolic metabolism  
234 to severe injury, describing the related dynamic changes for six months post-injury. Modelling the data has  
235 allowed us to provide a detailed description of the transition from catabolism to anabolism during recovery from  
236 severe injury, including investigating the impact of cumulative in-patient opioid dose. Our data are the first to  
237 provide detailed adrenal and gonadal steroids beyond the first days after trauma in a large cohort of young patients,  
238 with all patients recruited prospectively and steroid analysis carried out by tandem mass spectrometry.

239 As summarized in a recent meta-analysis (35), previous data on serum cortisol after injury are limited to  
240 small cohorts derived from elective surgery, rarely followed up for more than two days. In our study, serum  
241 cortisol quickly returned to normal following slight initial increases after acute trauma. In contrast, serum  
242 cortisone remained low for three months post-injury. Our study revealed an initial phase of minor glucocorticoid  
243 activation with a transient increase in the serum cortisol-to-cortisone ratio, with changes in urinary glucocorticoid  
244 metabolites indicative of increased  $11\beta$ -HSD1 activity. The cortisol-activating enzyme  $11\beta$ -HSD1 is the major  
245 enzyme converting inactive cortisone to cortisol and has been shown to be upregulated systemically and locally in  
246 response to inflammation, thereby dampening the inflammatory response (36,37). Skeletal muscle expresses  $11\beta$ -  
247 HSD1 (38), Previous studies reported increased  $11\beta$ -HSD1 activity in an animal model of trauma haemorrhage  
248 (39). and improved wound healing in mice treated with  $11\beta$ -HSD1 inhibitors (40). However, human data after  
249 trauma are lacking. There is substantial evidence indicating a reduced cortisol clearance in critical illness, due to  
250 decreased cortisol inactivation in liver and kidney (41), this mechanism could also be responsible for the slight  
251 changes in cortisol and cortisone we observed. This was corroborated by the observed reduction in the urinary  
252 cortisol-to-cortisone ratio, which is reflective of  $11\beta$ -HSD2 activity.

253 Interestingly, patients on higher opioid doses, showed a higher early peak in cortisol production after  
254 trauma, followed by persistently lower circulating cortisol during the recovery period, as compared with patients  
255 on lower opioid doses. Previous reports have described suppressive effects of opioids on the HPA axis, though  
256 studies in smaller mammals have indicated an acute stimulatory effect of opioid administration on serum cortisol  
257 concentrations (42,43).

258 We observed a pronounced and sustained loss of adrenal and gonadal androgen synthesis within the first  
259 24 hours following acute major trauma. The recovery of circulating DHEA and testosterone concentrations took  
260 two and four months post-injury, respectively, and DHEAS remained pathologically suppressed at the end of the  
261 six-month follow-up period. In a mouse model of acute inflammation, sustained suppression of the expression of  
262 the DHEA sulfotransferase SULT2A1 and its sulfate donor enzyme, PAPSS2, have been described (44). We  
263 reviewed 23 previous studies that measured serum DHEA and DHEAS in critically ill patients (**Suppl. Table 1**)  
264 (45), but most studies followed patients for only a few days and relatively few patients suffered from acute trauma.  
265 One previous study measured both serum DHEA and DHEAS in 181 patients with septic shock, and 31 patients  
266 with acute hip fracture (46). Serum DHEAS was decreased in both groups, while DHEA was increased in sepsis  
267 but decreased after trauma. This suggested an inflammation-mediated downregulation of DHEA sulfation after  
268 trauma, resulting in a dissociation of serum DHEA and DHEAS. In our study, this was also observed, as indicated  
269 by a sustained increase in the serum DHEA/DHEAS ratio and persistently low serum DHEAS concentrations.

270 A number of previous studies have described an association of infection and mortality with low circulating  
271 DHEAS concentrations and a raised serum cortisol-to-DHEAS ratio in patients with trauma (47-50). In vitro  
272 studies have demonstrated that cortisol decreases neutrophil superoxide production, which is counteracted by  
273 coinubation with DHEAS (47). Furthermore, we have previously shown that DHEAS, but not DHEA, directly  
274 enhances neutrophil superoxide generation; a key mechanism of human bactericidal function via activation of  
275 protein kinase C- $\beta$ , independent of androgen receptor signalling (51). In the present study, carried out in severely  
276 injured men younger than 50 years of age, we observed suppression of both serum DHEA and DHEAS post-injury,  
277 indicating that the loss of adrenal androgen synthesis is a trauma-related event. Importantly, we showed for the  
278 first time that this decrease in circulating adrenal androgen precursors is sustained for several months, and that  
279 DHEAS remains low even six months post-injury.

280 Alongside the decrease in adrenal androgen synthesis, we observed a near complete loss of gonadal  
281 testosterone production and pituitary LH secretion immediately after trauma. Both the gradual recovery of adrenal  
282 and gonadal androgen production paralleled the decrease in catabolism, as assessed by urinary nitrogen excretion  
283 and biceps muscle thickness. The suppression of the hypothalamus-pituitary-gonadal (HPG) axis after severe

284 injury shown in our study is supported by the literature (52-55). Our prospective, longitudinal data demonstrate  
285 that suppression of the HPG axis is of shorter duration than that of the HPA axis. In traumatic brain injury studies,  
286 a significant proportion of patients go on to develop anterior pituitary dysfunction including secondary  
287 hypogonadism (56). However, in our study traumatic brain injury was an exclusion criterion. While limited data  
288 from patients with burns and critical illness have suggested a central, hypothalamic-pituitary cause of trauma-  
289 related hypogonadism (57,58), the evidence prior to our study has been limited. Our data indicated a central cause  
290 of suppression to the gonadotrophic axis, with a decrease in both pituitary LH and gonadal testosterone.  
291 Interestingly, we observed a differential impact of the cumulative opioid dose on adrenal and gonadal androgens,  
292 respectively, with a significantly delayed recovery of DHEA and DHEAS, but a trend towards faster recovery of  
293 gonadal testosterone synthesis in patients with higher cumulative opioid doses. Previous data on opioid effects on  
294 adrenal androgen production are very scarce, but our findings with respect to gonadal testosterone biosynthesis  
295 contrasted previous studies describing suppressive opioid effects on the HPG axis (42,43).

296 Our study revealed a loss of both adrenal and gonadal androgen production in young and middle-aged  
297 men after major trauma. This effect was further enhanced by long-lasting suppression of androgen-activating  
298 systemic 5 $\alpha$ -reductase activity, as demonstrated by urinary steroid metabolite analysis. Androgens are important  
299 in wound healing, erythrocytosis, bone density and muscle mass (59). The catabolic state that occurs following  
300 trauma thus presents a significant challenge. The use of androgens to ameliorate catabolism has some precedent,  
301 as evidenced by the use of the synthetic androgen, oxandrolone, that has some proven benefit in treating burn  
302 injury (10). A meta-analysis of 15 Randomised Controlled Trials including 806 burns patients by Li et al, showed  
303 significant benefits ( $P < 0.05$ ) for using oxandrolone, including less net weight loss, lean body mass loss, nitrogen  
304 loss, donor-site healing time, and length of stay in the catabolic and rehabilitative phases (60). The use of  
305 oxandrolone in major trauma was investigated in two intensive care studies but no benefit was demonstrated  
306 (61,62).

307 The strengths of our study include its prospective nature, narrow age range of the patients, single  
308 gender, single site for recruitment and analysis and detailed follow-up over six months as well as the  
309 measurement of circulating (and in a smaller cohort also excreted) steroid hormones by state-of-the-art

310 mass spectrometry assays. Analysing a young to middle-aged patient cohort has also reduced the  
311 confounding effects of age-related co-morbidities. Another strength is the unique opportunity our study  
312 offered for analysis of the opioid effects on endocrine recovery, facilitated by detailed prospective,  
313 longitudinal phenotyping with dedicated software.

314 Our study was limited by the diverse nature of major trauma patients in relation to injury pattern and the  
315 involvement of military casualties. The timing and number of observations during our study was pragmatic and  
316 some statistical comparisons were made using modelled data. While we measured total cortisol and cortisone by  
317 tandem mass spectrometry, we did not measure free cortisol or cortisol-binding globulin. We were only able to  
318 measure urinary steroid excretion in a sub-cohort of patients, as accurate and repeated collection of 24-h urine  
319 proved very challenging under ICU conditions. The estimation of nitrogen excretion was pragmatic due to the  
320 diverse nature of the patients and we were not able to record nitrogen intake. Ultrasound estimation of muscle  
321 thickness was performed at four different body sites, but many individuals had limbs missing or extensive wounds  
322 that prevented measurements. While imperfect, the longitudinal nature of these measurements allowed us to model  
323 these changes over time.

324 In conclusion, in this most detailed and first prospective study of the steroid response to major trauma, we  
325 followed the patients from severe injury to six months of recovery, revealing pronounced and sustained decreases  
326 in adrenal and gonadal androgen biosynthesis. Recovery of androgen production in the severely injured patients  
327 was mirrored by a switch from catabolism to anabolism as reflected by recovery of muscle mass and a decrease in  
328 nitrogen loss. Adrenal and gonadal androgens correlated with risk of sepsis. It is tempting to suggest that an  
329 anabolic intervention with androgens or androgen precursors could have a beneficial effect on health outcomes  
330 during recovery from major trauma. However, this will need to be investigated by future intervention studies.

331 **Acknowledgements**

332           The SIR Study was part of the Surgeon General’s Casualty Nutrition Study (SGCNS), supported by  
333 University Hospitals Birmingham NHS Foundation Trust (UHB) and the University of Birmingham. Additional  
334 funding was provided by the Drummond Trust Foundation. WA and JM received support from the National  
335 Institute for Health Research (NIHR) Birmingham Biomedical Research Centre (Grant Reference Number BRC-  
336 1215-20009). The views expressed are those of the authors not necessarily those of the NIHR or the Department  
337 of Health and Social Care UK.

338           We thank staff from the NIHR Surgical Reconstruction and Microbiology Centre, Leah Duffy, Lauren  
339 Cooper, Peter Ip and Aisling Crombie; military nurses Michelle Taylor and Matt Daley; junior doctors from UHB,  
340 Abigail Routledge, Ben Booth, Rob Staruch and Researchers and staff from University of Birmingham, Hema  
341 Chahal, Donna M. O’Neil, Jon Hazeldine and Pete Hampson; Institute of Naval Medicine, Dr Adrian Allsopp,  
342 Sophie Britland, Dr Pieter Brown, Roz Cobley, Simon Delves, Anneliese Shaw, Dr Fran Gunner, Jenny Hayward-  
343 Karlsson; Defence Rehabilitation Centre Headley Court, Jakob Kristensen, Wg Cdr Alex Bennett; University of  
344 Surrey, Prof Susan Lanham-New; Imperial University, Prof Stephen Brett; Dr Kevin Murphy, Prof Gary Frost;  
345 members of SGCNS not already mentioned, Surg Cdr Jane Risdall, Andy Roberts, Lt Col Sandra Williams, and  
346 Col Duncan Wilson.

347 **References**

- 348 1. **World Health Organization.** *Injuries and violence: the facts 2014*. 2014.
- 349 2. **OECD I.** Road Safety Annual Report. *International Transport Forum* 2014.
- 350 3. **Office GBNA.** *Major Trauma Care in England*. The Stationery Office; 2010.
- 351 4. **Moran CG, Lecky F, Bouamra O, Lawrence T, Edwards A, Woodford M, Willett K, Coats TJ.**  
352 Changing the System - Major Trauma Patients and Their Outcomes in the NHS (England) 2008-17.  
353 *EClinicalMedicine* 2018;2:13–21. doi:10.1016/j.eclinm.2018.07.001.
- 354 5. **Ministry of Defence.** Operations in Afghanistan. [https://www.gov.uk/guidance/uk-forces-operations-in-](https://www.gov.uk/guidance/uk-forces-operations-in-afghanistan/casualty-figures)  
355 [afghanistan/casualty-figures](https://www.gov.uk/guidance/uk-forces-operations-in-afghanistan/casualty-figures) 2015:1–69.
- 356 6. **Ministry of Defence.** UK forces: operations in Afghanistan. [https://www.gov.uk/guidance/uk-forces-](https://www.gov.uk/guidance/uk-forces-operations-in-afghanistan/casualty-figures)  
357 [operations-in-afghanistan/casualty-figures](https://www.gov.uk/guidance/uk-forces-operations-in-afghanistan/casualty-figures) 2014:1–27 (Accessed 5 Jan 16).
- 358 7. **Hodgetts TJ, Mahoney PF.** Military pre-hospital care: why is it different? *J R Army Med Corps*  
359 2009;155(1):4–8.
- 360 8. **Durham RM, Moran JJ, Mazuski JE, Shapiro MJ, Baue AE, Flint LM.** Multiple organ failure in  
361 trauma patients. *J Trauma* 2003;55(4):608–616. doi:10.1097/01.TA.0000092378.10660.D1.
- 362 9. **Lenz A, Franklin GA, Cheadle WG.** Systemic inflammation after trauma. *Injury* 2007;38(12):1336–  
363 1345. doi:10.1016/j.injury.2007.10.003.
- 364 10. **Wolf SE, Edelman LS, Kemalyan N, Donison L, Cross J, Underwood M, Spence RJ, Noppenberger**  
365 **D, Palmieri TL, Greenhalgh DG, Lawless M, Voigt D, Edwards P, Warner P, Kagan R, Hatfield S,**  
366 **Jeng J, Crean D, Hunt J, Purdue G, Burris A, Cairns B, Kessler M, Klein RL, Baker R, Yowler C,**  
367 **Tutulo W, Foster K, Caruso D, Hildebrand B, Benjamin W, Villarreal C, Sanford AP, Saffle J.**  
368 Effects of oxandrolone on outcome measures in the severely burned: a multicenter prospective  
369 randomized double-blind trial. *J Burn Care Res* 2006;27(2):131–9; discussion 140–1.  
370 doi:10.1097/01.BCR.0000202620.55751.4F.
- 371 11. **Arbabi S, Ahrns KS, Wahl WL, Hemmila MR, Wang SC, Brandt M-M, Taheri PA.** Beta-blocker  
372 use is associated with improved outcomes in adult burn patients. *The Journal of Trauma: Injury,*  
373 *Infection, and Critical Care* 2004;56(2):265–9– discussion 269–71.  
374 doi:10.1097/01.TA.0000109859.91202.C8.
- 375 12. **Esteves CL, Verma M, Róg-Zielińska E, Kelly V, Sai S, Breton A, Donadeu FX, Seckl JR,**  
376 **Chapman KE.** Pro-inflammatory cytokine induction of 11 $\beta$ -hydroxysteroid dehydrogenase type 1 in  
377 A549 cells requires phosphorylation of C/EBP $\beta$  at Thr235. *PLoS ONE* 2013;8(9):e75874.  
378 doi:10.1371/journal.pone.0075874.
- 379 13. **Palmer C.** Major trauma and the injury severity score--where should we set the bar? *Annu Proc Assoc*  
380 *Adv Automot Med* 2007;51:13–29.
- 381 14. **Balogh ZJ, Varga E, Tomka J, Süveges G, Tóth L, Simonka JA.** The new injury severity score is a  
382 better predictor of extended hospitalization and intensive care unit admission than the injury severity  
383 score in patients with multiple orthopaedic injuries. *J Orthop Trauma* 2003;17(7):508–512.



- 384 15. **Le Gall J-R, Lemeshow S, Saulnier F.** A New Simplified Acute Physiology Score (SAPS II) Based on  
385 a European/North American Multicenter Study. *JAMA* 1993;270(24):2957–2963.  
386 doi:10.1001/jama.1993.03510240069035.
- 387 16. **Knaus WA, Draper EA, Wagner DP, Zimmerman JE.** APACHE II: a severity of disease classification  
388 system. *Crit Care Med* 1985;13(10):818–829.
- 389 17. **Bone RC, Balk RA, Cerra FB, Dellinger RP, Fein AM, Knaus WA, Schein RM, Sibbald WJ.**  
390 Definitions for sepsis and organ failure and guidelines for the use of innovative therapies in sepsis. The  
391 ACCP/SCCM Consensus Conference Committee. American College of Chest Physicians/Society of  
392 Critical Care Medicine. In: Vol 101. 1992:1644–1655.
- 393 18. Prescribing Information and Communications System (PICS). 2019:1–1. Available at:  
394 <https://www.uhb.nhs.uk/birmingham-systems-pics.htm>. Accessed November 14, 2019.
- 395 19. **Lasheen W, Walsh D, Mahmoud F, Sarhill N, Rivera N, Davis M, Lagman R, Legrand S.** The  
396 intravenous to oral relative milligram potency ratio of morphine during chronic dosing in cancer pain.  
397 *Palliat Med* 2010;24(1):9–16. doi:10.1177/0269216309346595.
- 398 20. **Campbell IT, Watt T, Withers D, England R, Sukumar S, Keegan MA, Faragher B, Martin DF.**  
399 Muscle thickness, measured with ultrasound, may be an indicator of lean tissue wasting in multiple organ  
400 failure in the presence of edema. *Am J Clin Nutr* 1995;62(3):533–539.
- 401 21. **Reid CL, Campbell IT, Little RA.** Muscle wasting and energy balance in critical illness. *Clin Nutr*  
402 2004;23(2):273–280. doi:10.1016/S0261-5614(03)00129-8.
- 403 22. **Clark RV, Walker AC, Miller RR, O'Connor-Semmes RL, Ravussin E, Cefalu WT.** Creatine (  
404 methyl-d3) dilution in urine for estimation of total body skeletal muscle mass: accuracy and variability  
405 vs. MRI and DXA. *Journal of Applied Physiology* 2018;124(1):1–9.  
406 doi:10.1152/jappphysiol.00455.2016.
- 407 23. **Buckinx F, Landi F, Cesari M, Fielding RA, Visser M, Engelke K, Maggi S, Dennison E, Al-Daghri  
408 NM, Allepaerts S, Bauer J, Bautmans I, Brandi ML, Bruyère O, Cederholm T, Cerrera F,  
409 Cherubini A, Cooper C, Cruz-Jentoft A, McCloskey E, Dawson-Hughes B, Kaufman J-M, Laslop  
410 A, Petermans J, Reginster J-Y, Rizzoli R, Robinson S, Rolland Y, Rueda R, Vellas B, Kanis JA.**  
411 Pitfalls in the measurement of muscle mass: a need for a reference standard. *J Cachexia Sarcopenia*  
412 *Muscle* 2018;9(2):269–278. doi:10.1002/jcsm.12268.
- 413 24. **Milner EA, Cioffi WG, Mason AD, McManus WF, Pruitt BA.** Accuracy of urinary urea nitrogen for  
414 predicting total urinary nitrogen in thermally injured patients. *JPEN J Parenter Enteral Nutr*  
415 1993;17(5):414–416. doi:10.1177/0148607193017005414.
- 416 25. **Ionita IA, Fast DM, Akhlaghi F.** Development of a sensitive and selective method for the quantitative  
417 analysis of cortisol, cortisone, prednisolone and prednisone in human plasma. *J. Chromatogr. B Analyt.*  
418 *Technol. Biomed. Life Sci.* 2009;877(8-9):765–772. doi:10.1016/j.jchromb.2009.02.019.
- 419 26. **Kushnir MM, Blamires T, Rockwood AL, Roberts WL, Yue B, Erdogan E, Bunker AM, Meikle  
420 AW.** Liquid chromatography-tandem mass spectrometry assay for androstenedione,  
421 dehydroepiandrosterone, and testosterone with pediatric and adult reference intervals. *Clinical Chemistry*  
422 2010;56(7):1138–1147. doi:10.1373/clinchem.2010.143222.
- 423 27. **O'Reilly MW, Taylor AE, Crabtree NJ, Hughes BA, Capper F, Crowley RK, Stewart PM,  
424 Tomlinson JW, Arlt W.** Hyperandrogenemia predicts metabolic phenotype in polycystic ovary

- 425 syndrome: the utility of serum androstenedione. *J Clin Endocrinol Metab* 2014;99(3):1027–1036.  
426 doi:10.1210/jc.2013-3399.
- 427 28. **Chadwick CA, Owen LJ, Keevil BG.** Development of a method for the measurement of  
428 dehydroepiandrosterone sulphate by liquid chromatography-tandem mass spectrometry. *Ann. Clin.*  
429 *Biochem.* 2005;42(Pt 6):468–474. doi:10.1258/000456305774538175.
- 430 29. **Haring R, Wallaschofski H, Teumer A, Kroemer H, Taylor AE, Shackleton CHL, Nauck M, Volker**  
431 **U, Homuth G, Arlt W.** A SULT2A1 genetic variant identified by GWAS as associated with low serum  
432 DHEAS does not impact on the actual DHEA/DHEAS ratio. *Journal of Molecular Endocrinology*  
433 2012;50(1):73–77. doi:10.1530/JME-12-0185.
- 434 30. **Shackleton CH.** Mass spectrometry in the diagnosis of steroid-related disorders and in hypertension  
435 research. *J. Steroid Biochem. Mol. Biol.* 1993;45(1-3):127–140. doi:10.1016/0960-0760(93)90132-g.
- 436 31. **Breslow NE, Clayton DG.** Approximate Inference in Generalized Linear Mixed Models. *Journal of the*  
437 *American Statistical Association* 2012;88(421):9–25. doi:10.1080/01621459.1993.10594284.
- 438 32. **Meyer MC.** Inference using shape-restricted regression splines. *Ann. Appl. Stat.* 2008;2(3):1013–1033.  
439 doi:10.1214/08-AOAS167.
- 440 33. **Harrell FE, Lee KL, Mark DB.** Multivariable prognostic models: issues in developing models,  
441 evaluating assumptions and adequacy, and measuring and reducing errors. *Stat Med* 1996;15(4):361–387.  
442 doi:10.1002/(SICI)1097-0258(19960229)15:4<361::AID-SIM168>3.0.CO;2-4.
- 443 34. **Foster MA.** The Endocrine and Metabolic Response in Male Survivors of Major Trauma -  
444 Supplementary Figures. *figshare* 2019:1–3. doi:10.6084/m9.figshare.8335223.v2.
- 445 35. **Prete A, Yan Q, Al-Tarrach K, Akturk HK, Prokop LJ, Alahdab F, Foster MA, Lord JM,**  
446 **Karavitaki N, Wass JA, Murad MH, Arlt W, Bancos I.** The cortisol stress response induced by  
447 surgery: A systematic review and meta-analysis. *Clin Endocrinol* 2018;89(5):554–567.  
448 doi:10.1111/cen.13820.
- 449 36. **Chapman KE, Coutinho A, Gray M, Gilmour JS, Savill JS, Seckl JR.** Local amplification of  
450 glucocorticoids by 11beta-hydroxysteroid dehydrogenase type 1 and its role in the inflammatory  
451 response. *Ann NY Acad Sci* 2006;1088(1):265–273. doi:10.1196/annals.1366.030.
- 452 37. **Ray JA, Meikle AW.** Cortisol-Cortisone Shuttle: A Functional Indicator of 11beta-HSD Activity. In:  
453 *Cortisol Physiology, Regulation and Health Implications.* 2012:91–106.
- 454 38. **Hassan-Smith ZK, Morgan SA, Sherlock M, Hughes B, Taylor AE, Lavery GG, Tomlinson JW,**  
455 **Stewart PM.** Gender-Specific Differences in Skeletal Muscle 11β-HSD1 Expression Across Healthy  
456 Aging. *J Clin Endocrinol Metab* 2015;100(7):2673–2681. doi:10.1210/jc.2015-1516.
- 457 39. **Wang P, Ba ZF, Jarrar D, Cioffi WG, Bland KI, Chaudry IH.** Mechanism of adrenal insufficiency  
458 following trauma and severe hemorrhage: role of hepatic 11beta-hydroxysteroid dehydrogenase. *Arch*  
459 *Surg* 1999;134(4):394–401.
- 460 40. **Tiganescu A, Tahrani AA, Morgan SA, Otranto M, Desmoulière A, Abrahams L, Hassan-Smith Z,**  
461 **Walker EA, Rabbitt EH, Cooper MS, Amrein K, Lavery GG, Stewart PM.** 11β-Hydroxysteroid  
462 dehydrogenase blockade prevents age-induced skin structure and function defects. *The Journal of*  
463 *Clinical Investigation* 2013;123(7):3051–3060. doi:10.1172/JCI64162.

- 464 41. **Boonen E, Vervenne H, Meersseman P, Andrew R, Mortier L, Declercq PE, Vanwijngaerden Y-M,**  
465 **Spriet I, Wouters PJ, Vander Perre S, Langouche L, Vanhorebeek I, Walker BR, Van den Berghe**  
466 **G.** Reduced cortisol metabolism during critical illness. *New England Journal of Medicine*  
467 2013;368(16):1477–1488. doi:10.1056/NEJMoa1214969.
- 468 42. **de Vries F, Bruin M, Lobatto DJ, Dekkers OM, Schoones JW, van Furth WR, Pereira AM,**  
469 **Karavitaki N, Biermasz NR, Zamanipoor Najafabadi AH.** Opioids and their endocrine effects: A  
470 systematic review and meta-analysis. *J Clin Endocrinol Metab* 2019. doi:10.1210/clinem/dgz022.
- 471 43. **Fountas A, Chai ST, Kourkouti C, Karavitaki N.** MECHANISMS OF ENDOCRINOLOGY:  
472 Endocrinology of opioids. *Eur. J. Endocrinol.* 2018;179(4):R183–R196. doi:10.1530/EJE-18-0270.
- 473 44. **Kim MS, Shigenaga J, Moser A, Grunfeld C, Feingold KR.** Suppression of DHEA sulfotransferase  
474 (Sult2A1) during the acute-phase response. *Am J Physiol Endocrinol Metab* 2004;287(4):E731–8.  
475 doi:10.1152/ajpendo.00130.2004.
- 476 45. **Foster MA.** SupplTable1\_SupplReferences\_JCEM\_25Nov19. 2019:1–4. Available at:  
477 <https://doi.org/10.6084/m9.figshare.8332736.v1>.
- 478 46. **Arlt W, Hammer F, Sanning P, Butcher SK, Lord JM, Allolio B, Annane D, Stewart PM.**  
479 Dissociation of serum dehydroepiandrosterone and dehydroepiandrosterone sulfate in septic shock.  
480 *Journal of Clinical Endocrinology & Metabolism* 2006;91(7):2548–2554. doi:10.1210/jc.2005-2258.
- 481 47. **Butcher SK, Killampalli V, Lascelles D, Wang K, Alpar EK, Lord JM.** Raised cortisol:DHEAS ratios  
482 in the elderly after injury: potential impact upon neutrophil function and immunity. *Aging Cell*  
483 2005;4(6):319–324. doi:10.1111/j.1474-9726.2005.00178.x.
- 484 48. **Beishuizen A, Thijs LG, Vermes I.** Decreased levels of dehydroepiandrosterone sulphate in severe  
485 critical illness: a sign of exhausted adrenal reserve? *Crit Care* 2002;6(5):434–438.
- 486 49. **Lindh A, Carlström K, Eklund J, Wilking N.** Serum steroids and prolactin during and after major  
487 surgical trauma. *Acta Anaesthesiol Scand* 1992;36(2):119–124. doi:10.1111/j.1399-6576.1992.tb03436.x.
- 488 50. **Parker CR Jr, Baxter CR.** Divergence in adrenal steroid secretory pattern after thermal injury in adult  
489 patients. *J Trauma* 1985.
- 490 51. **Radford DJ, Wang K, McNelis JC, Taylor AE, Hechenberger G, Hofmann J, Chahal H, Arlt W,**  
491 **Lord JM.** Dehydroepiandrosterone sulfate directly activates protein kinase C-beta to increase human  
492 neutrophil superoxide generation. *Mol Endocrinol* 2010;24(4):813–821. doi:10.1210/me.2009-0390.
- 493 52. **Folan MM, Stone RA, Pittenger AL, Stoffel JA, Hess MM, Kroboth PD.** Dehydroepiandrosterone,  
494 dehydroepiandrosterone-sulfate, and cortisol concentrations in intensive care unit patients. *Crit Care Med*  
495 2001;29(5):965–970.
- 496 53. **Ilias I, Stamoulis K, Armaganidis A, Lyberopoulos P, Tzanela M, Orfanos S, Theodorakopoulou**  
497 **M, Tsagarakis S, Dimopoulou I.** Contribution of endocrine parameters in predicting outcome of  
498 multiple trauma patients in an intensive care unit. *Hormones (Athens)* 2007;6(3):218–226.
- 499 54. **Brorsson C, Dahlqvist P, Nilsson L, Thunberg J, Sylvan A, Naredi S.** Adrenal response after trauma  
500 is affected by time after trauma and sedative/analgesic drugs. *Injury* 2014:1–30.  
501 doi:10.1016/j.injury.2014.02.001.

- 502 55. **Bergquist M, Huss F, Fredén F, Mass GHC, 2016.** Altered adrenal and gonadal steroids biosynthesis in  
503 patients with burn injury. *Clinical Mass Spectrometry* 2016;1:19–26. doi:10.1016/j.clinms.2016.10.002.
- 504 56. **Berg C, Oeffner A, Schumm-Draeger PM, Badorrek F, Brabant G, Gerbert B, Bornstein S,**  
505 **Zimmermann A, Weber M, Broecker-Preuss M, Mann K, Herrmann BL.** Prevalence of anterior  
506 pituitary dysfunction in patients following traumatic brain injury in a German multi-centre screening  
507 program. *Exp Clin Endocrinol Diabetes* 2010;118(2):139–144. doi:10.1055/s-0029-1225611.
- 508 57. **Vogel AV, Peake GT, Rada RT.** Pituitary-testicular axis dysfunction in burned men. *J Clin Endocrinol*  
509 *Metab* 1985;60(4):658–665. doi:10.1210/jcem-60-4-658.
- 510 58. **Spratt DI, Bigos ST, Beitins I, Cox P, Longcope C, Orav J.** Both hyper- and hypogonadotropic  
511 hypogonadism occur transiently in acute illness: bio- and immunoactive gonadotropins. *J Clin*  
512 *Endocrinol Metab* 1992;75(6):1562–1570. doi:10.1210/jcem.75.6.1464665.
- 513 59. **Demling RH.** Comparison of the anabolic effects and complications of human growth hormone and the  
514 testosterone analog, oxandrolone, after severe burn injury. *Burns* 1999;25:215–221.
- 515 60. **Li H, Guo Y, Yang Z, Roy M, Guo Q.** The efficacy and safety of oxandrolone treatment for patients  
516 with severe burns: A systematic review and meta-analysis. *Burns* 2016;42(4):717–727.  
517 doi:10.1016/j.burns.2015.08.023.
- 518 61. **Bulger EM, Jurkovich GJ, Farver CL, Klotz P, Maier RV.** Oxandrolone does not improve outcome of  
519 ventilator dependent surgical patients. *Ann Surg* 2004;240(3):472–8– discussion 478–80.
- 520 62. **Gervasio JM, Dickerson RN, Swearingen J, Yates ME, Yuen C, Fabian TC, Croce MA, Brown RO.**  
521 Oxandrolone in trauma patients. *Pharmacotherapy* 2000;20(11):1328–1334.

522

## 523 **Figure Legends**

524 **Figure 1. Consort diagram.** (A) recruitment process and (B) subgroup selection for analysis for sixty male  
525 survivors of severe injury (NISS>15) under 50 years of age who had not been given exogenous steroids were  
526 analysed.

527 **Figure 2. Patient Characteristics of the Analysis Cohort.** (A) Demographics, (B) Mechanism of Injury and (C)  
528 the distribution of septic episodes for 60 male survivors from severe injury (NISS>15) under 50 years of age.

529 **Figure 3. Serum steroids in 60 male survivors of severe injury (NISS>15) under 50 years of age.** Serum  
530 concentrations shown include cortisol (A), cortisone (B), the cortisol-to-cortisone ratio (C), DHEA (D), DHEAS  
531 (E), the DHEA-to-DHEAS ratio (F), the cortisol-to-DHEAS ratio (G), androstenedione (H), and testosterone (I).  
532 Data are represented after modelling of the raw data (Suppl. Fig. 1) using a non-linear mixed effects model that

533 accounts for unbalanced repeated measures using a 4-knot cubic spline. Modelled data are shown as means and  
534 95% confidence intervals.

535 **Figure 4. The relationship between (A) Urinary Nitrogen Excretion or (B) biceps muscle thickness with (B**  
536 **and D) DHEA and (C and F) testosterone, over time for young (<50), severely injured (NISS>15) males who**  
537 **had survived and not been given anabolic steroids.** Muscle thickness data was modelled using a mixed effects  
538 technique; modelling time as a 6 and 7-knot restricted cubic spline respectively provided the best fit. Data are  
539 means and 95% confidence intervals for model-based predicted fixed effects of time are shown.

540 **Figure 5. Sequential Organ Failure Assessment (SOFA) score and probability of sepsis in relation to**  
541 **endocrine response.** SOFA and sepsis are related serum concentrations of DHEA (Panels A+B), DHEAS (Panels  
542 C+D), and testosterone (E+F). Data were modelled using a non-linear mixed effects model that accounts for  
543 unbalanced repeated measures using a 4-knot cubic spline. Modelled data are reported as means and 95%  
544 confidence intervals.

545 **Figure 6. Impact of total inpatient opioid dose on circulating glucocorticoids after major trauma.** Serum  
546 concentrations are scaled for cortisol, cortisone, the cortisol-to-cortisone ratio and the cortisol-to-DHEAS ratio.  
547 Data are represented after modelling of the raw data using a non-linear mixed effects model that accounts for  
548 unbalanced repeated measures using a 4-knot cubic spline. Modelled data are shown as means and 95% confidence  
549 intervals.

550 **Figure 7. Impact of total inpatient opioid dose on serum androgen and androgen precursors after major**  
551 **trauma.** Serum concentrations are scaled for DHEA, DHEAS, the DHEA/ DHEAS ratio, and testosterone. Data  
552 are represented after modelling of the raw data using a non-linear mixed effects model that accounts for unbalanced  
553 repeated measures using a 4-knot cubic spline. Modelled data are shown as means and 95% confidence intervals.

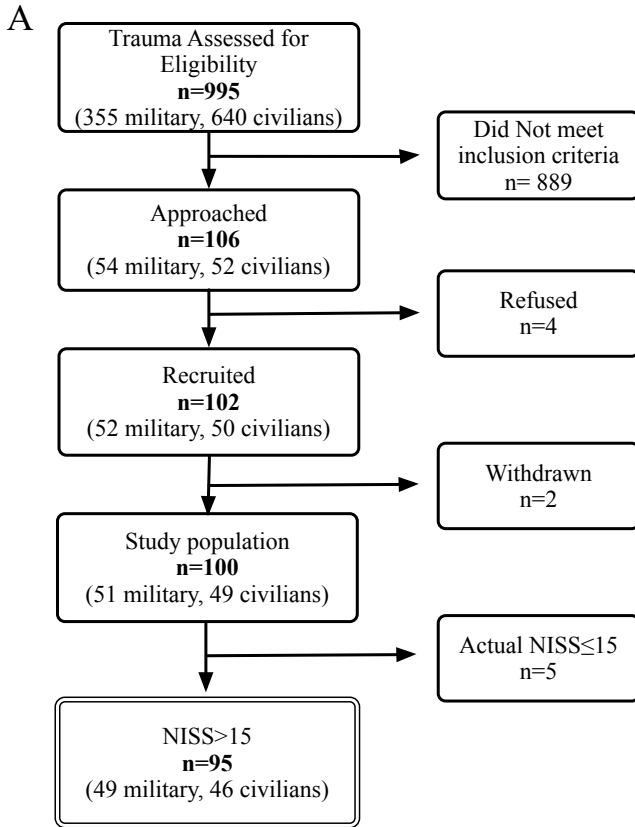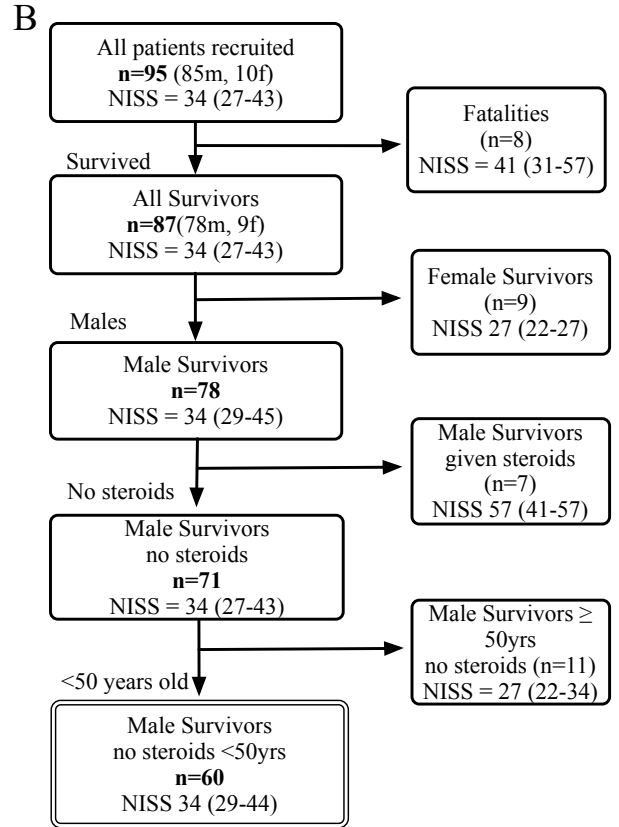

**A**

| <b>Demographics</b>           |              |
|-------------------------------|--------------|
| Patients n=60                 | Median (IQR) |
| Age                           | 27 (24-31)   |
| GCS                           | 14 (3-15)    |
| ISS                           | 25 (17-32)   |
| NISS                          | 34 (29-44)   |
| TRISS                         | 94 (56-98)   |
| APACHE 2 (Day1)               | 21 (14-25)   |
| SAPS 2 (Day1)                 | 48 (26-54)   |
| SOFA (Day1)                   | 9 (6-10)     |
| Septic Episodes               | 1 (0-2)      |
| RBCs (Day1), Units            | 10 (2-17)    |
| FFP (Day 1), Units            | 9 (1-15)     |
| Crystalloid/colloid (Day1), L | 0 (0-1)      |
| Ventilator Days               | 9 (5-12)     |
| ICU Length of Stay, Days      | 9 (5-16)     |
| Operative procedures          | 5 (3-7.5)    |
| Hospital Length of Stay, Days | 36 (19-56)   |

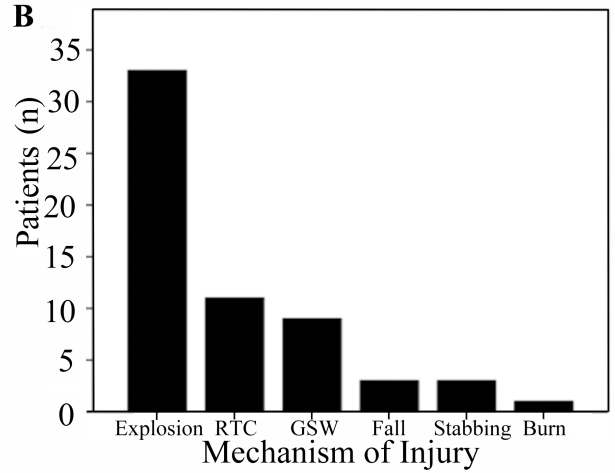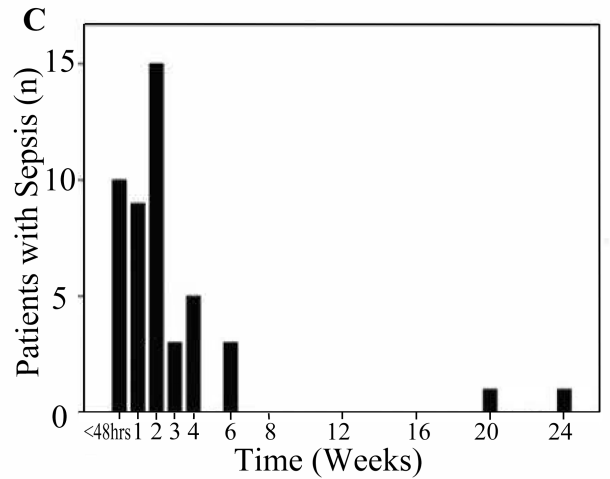

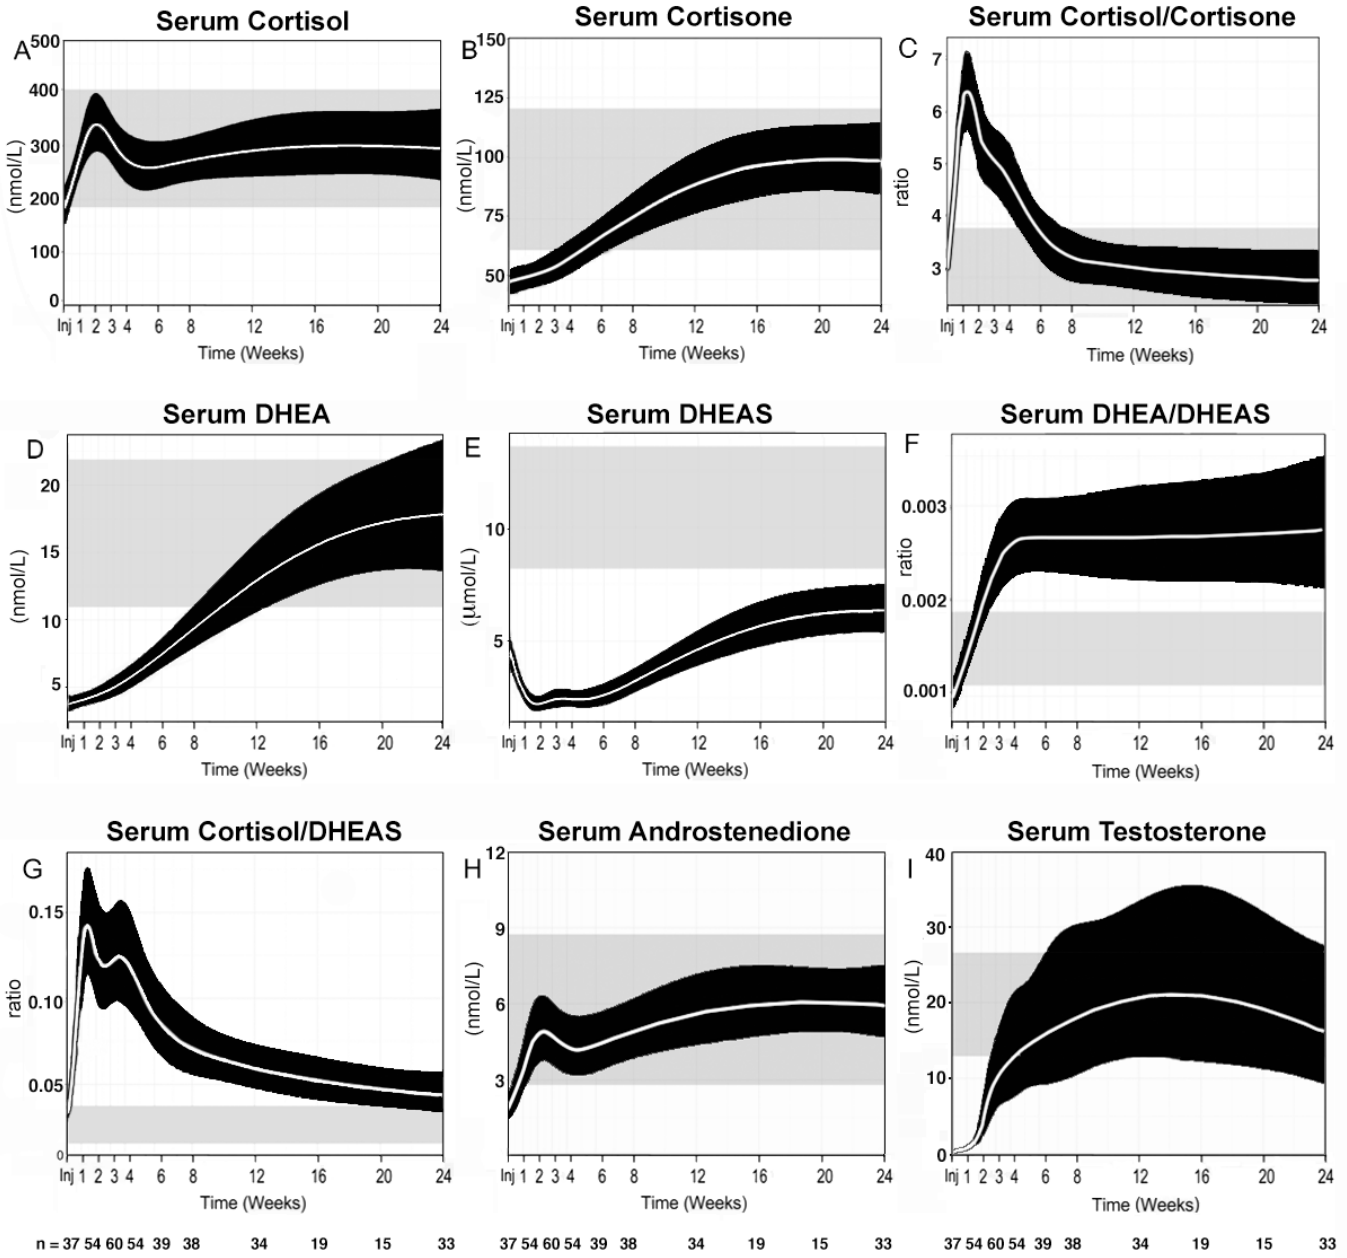



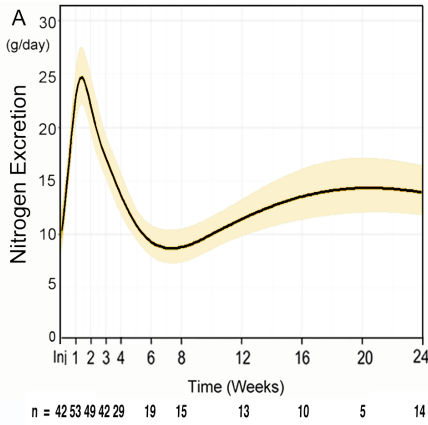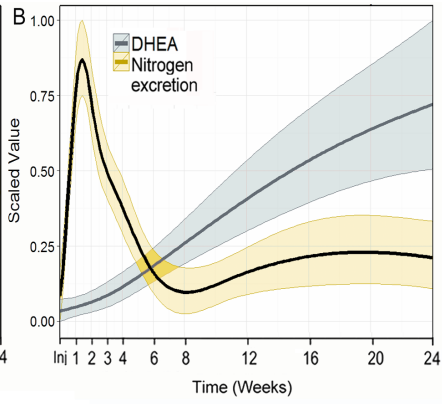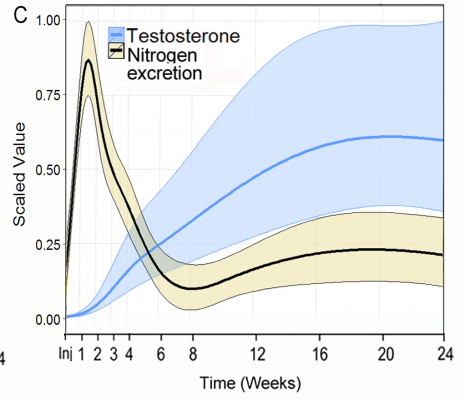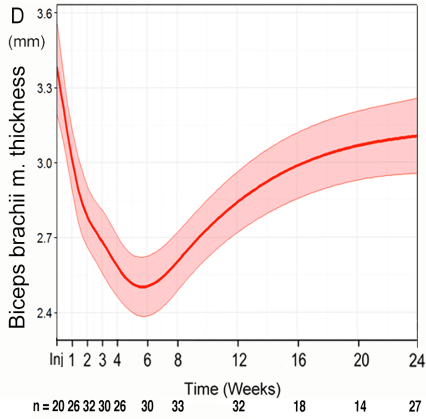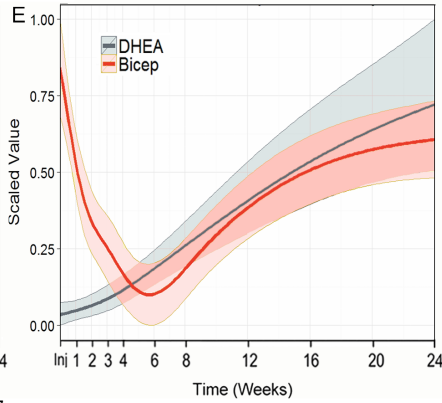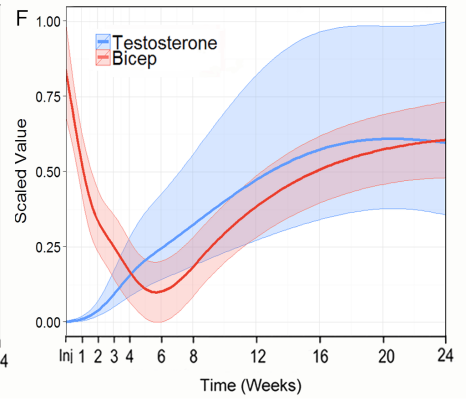

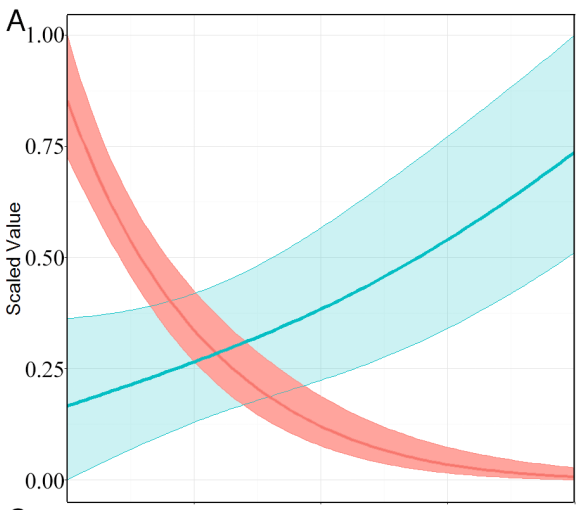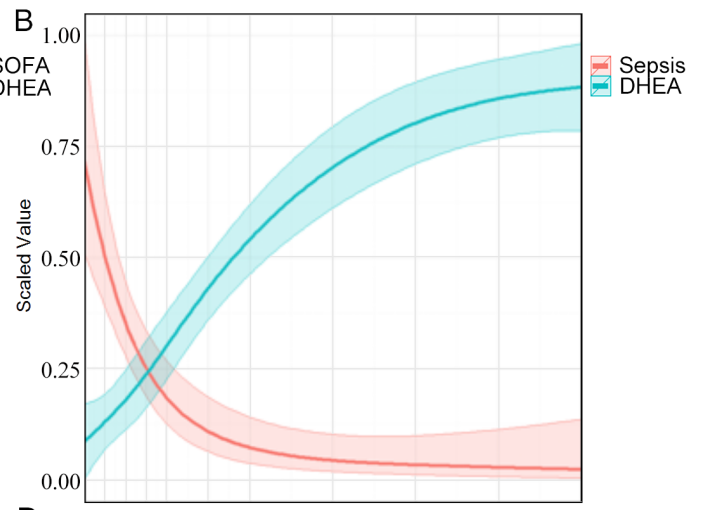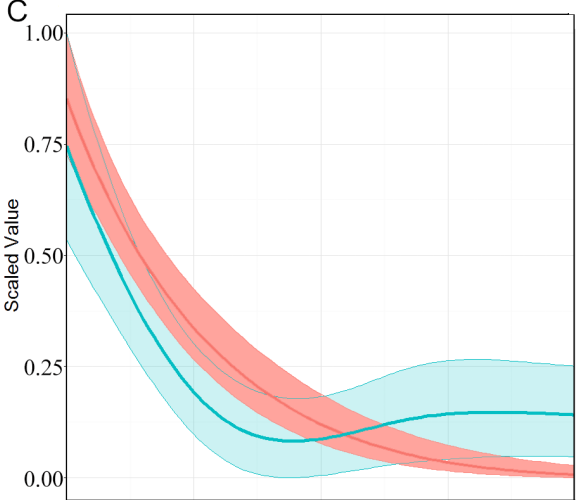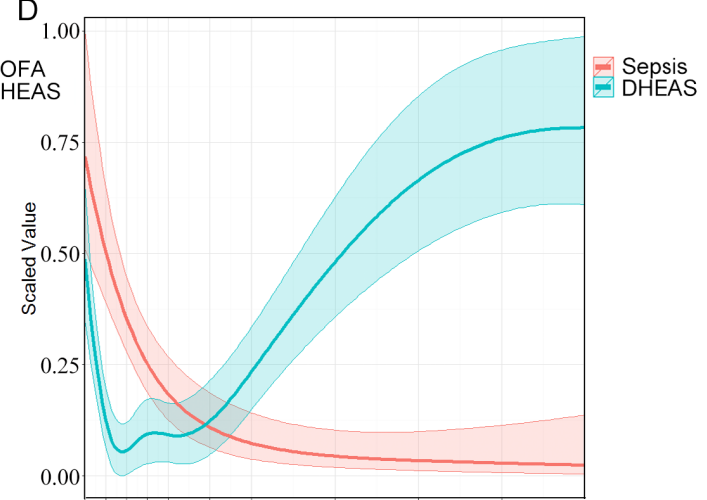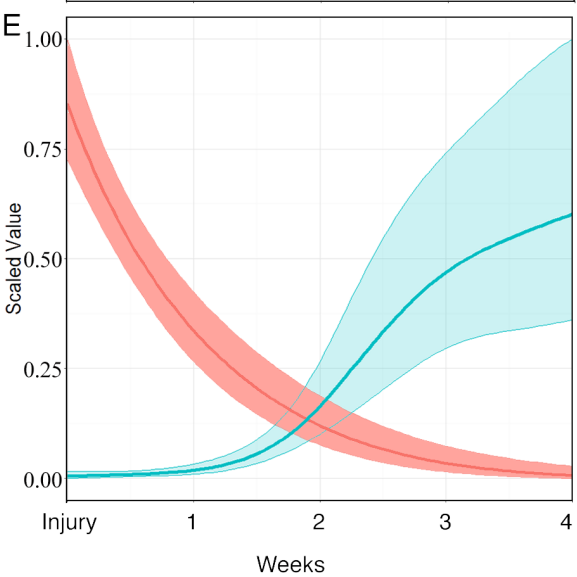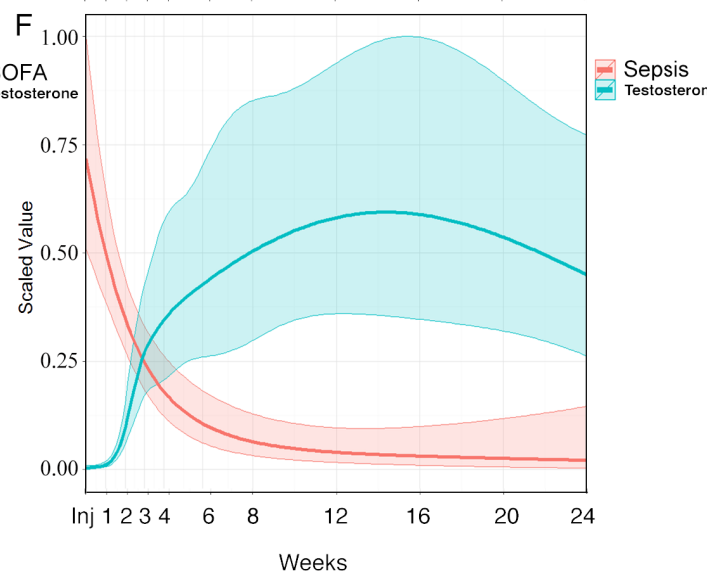

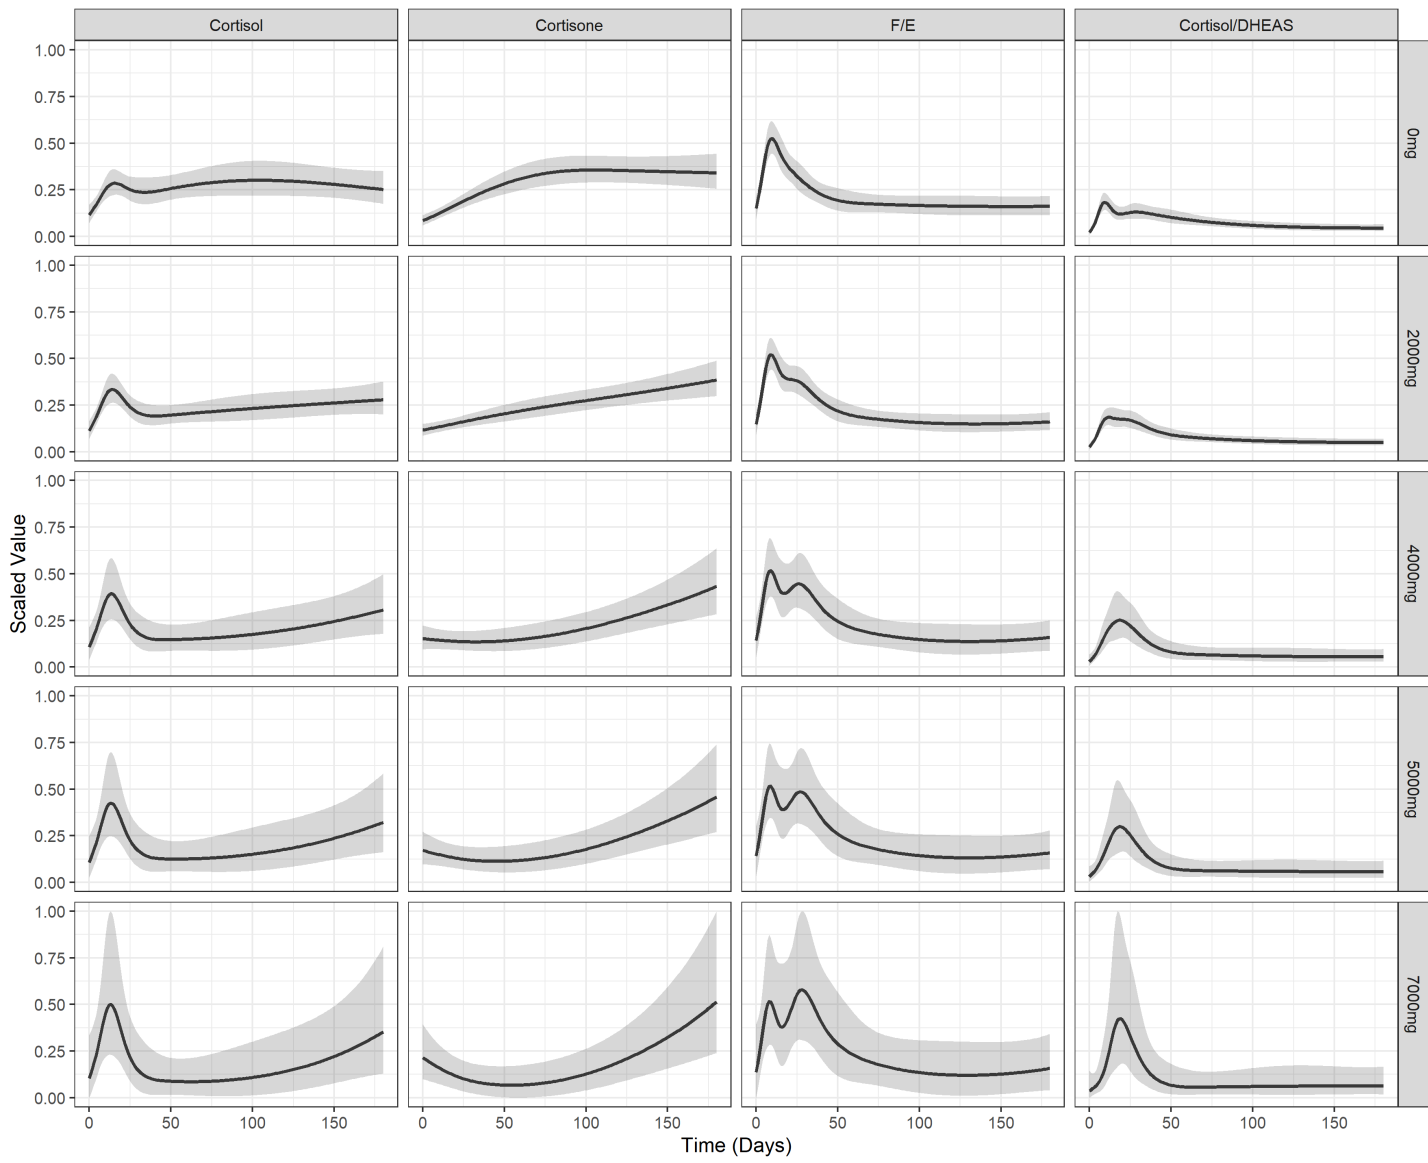

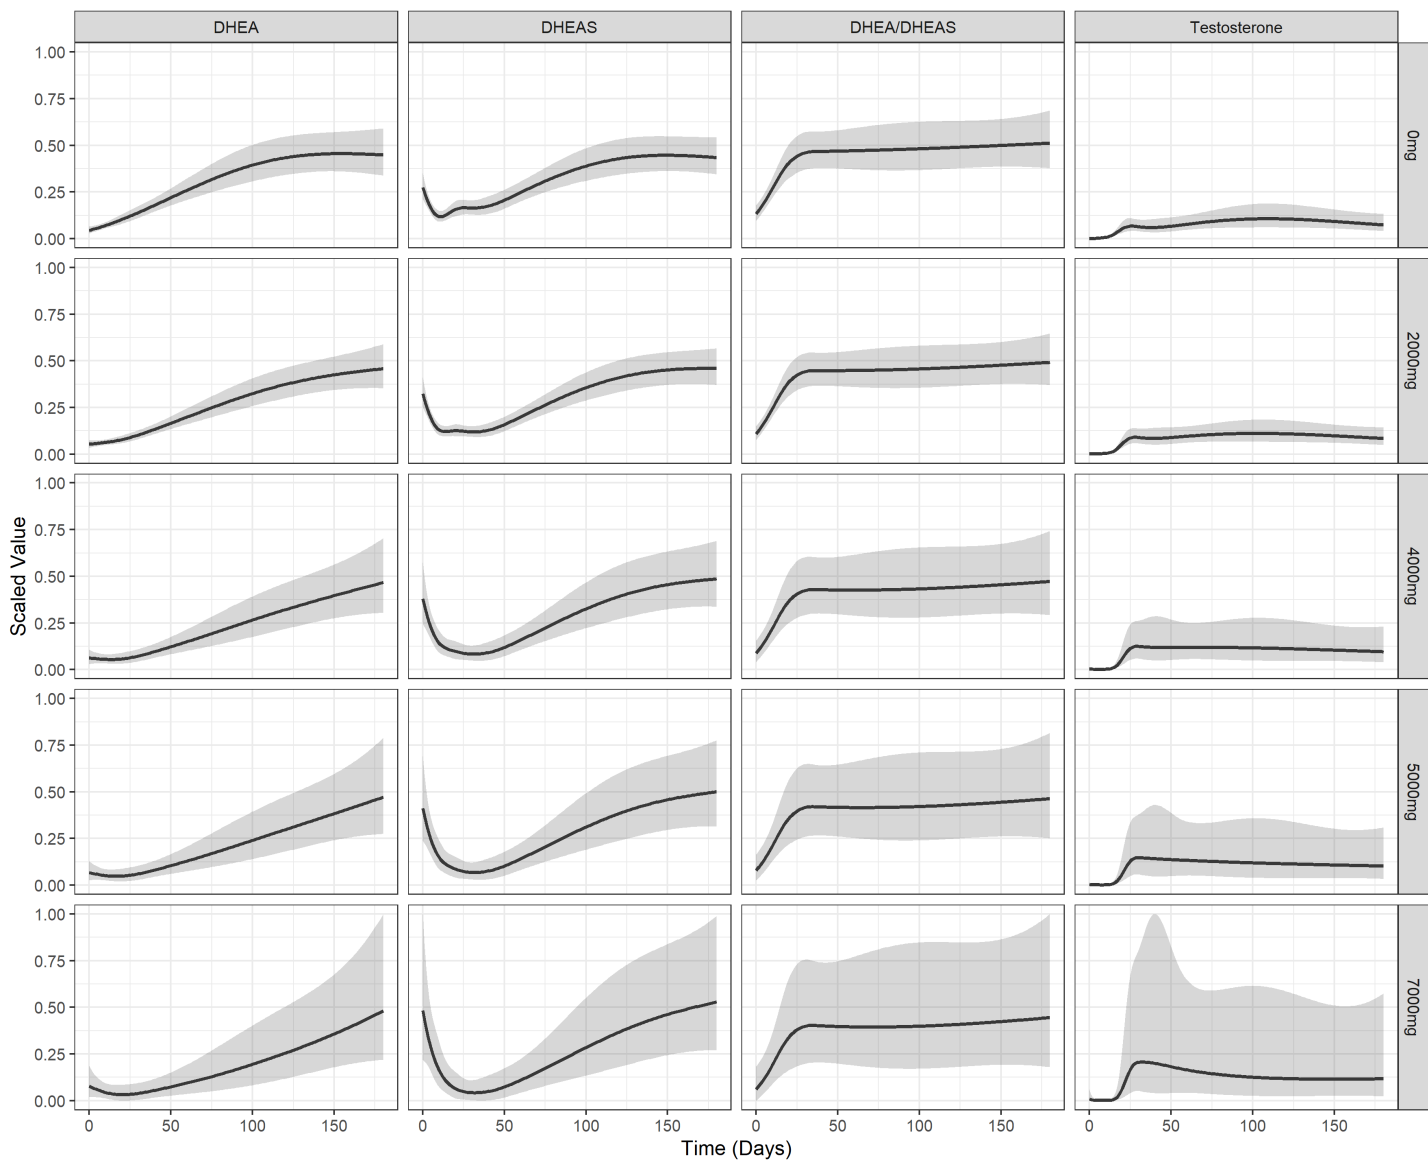

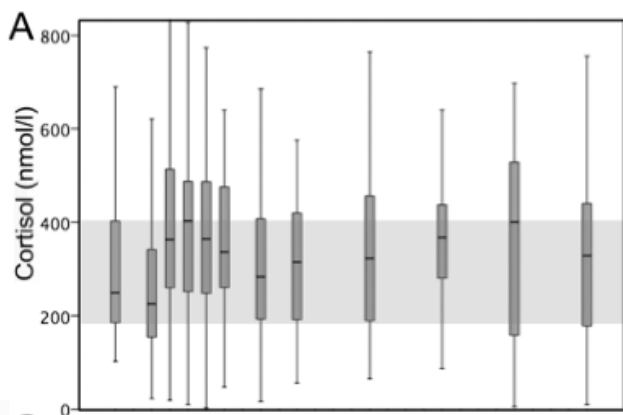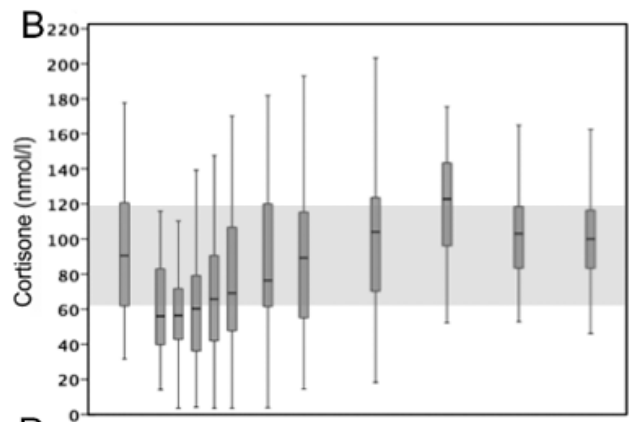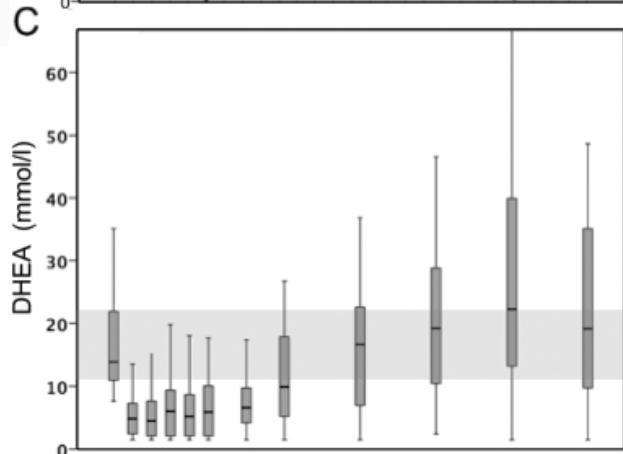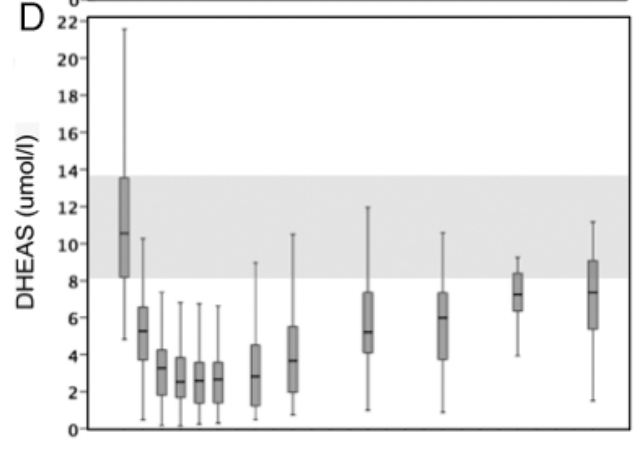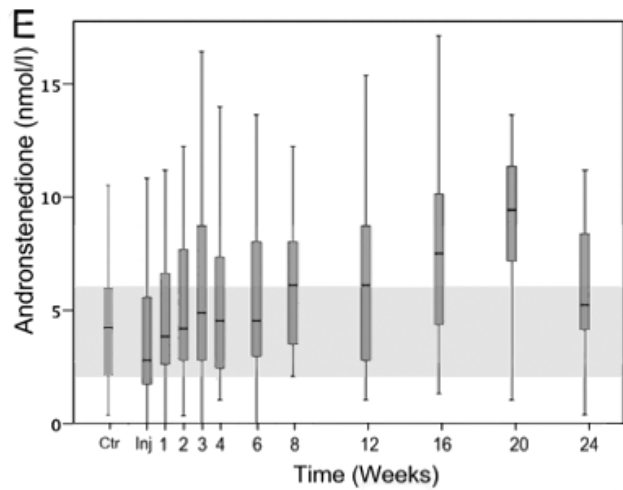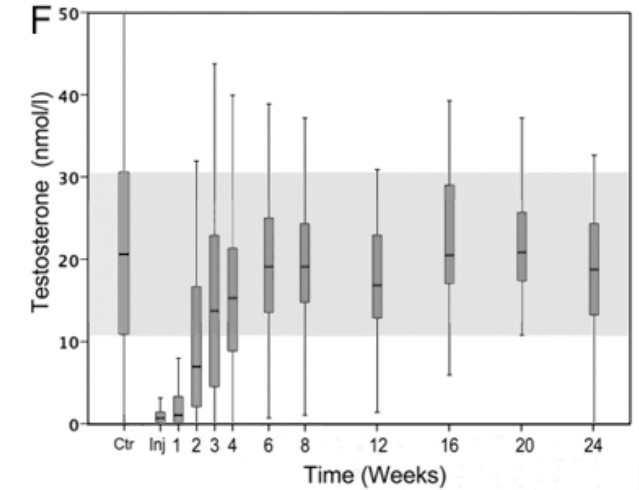

n= 37 54 60 54 39 27 38 34 19 15 33

n= 37 54 60 54 39 27 38 34 19 15 33

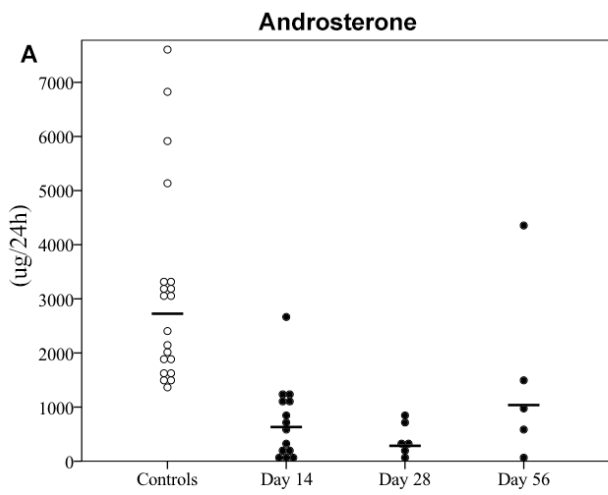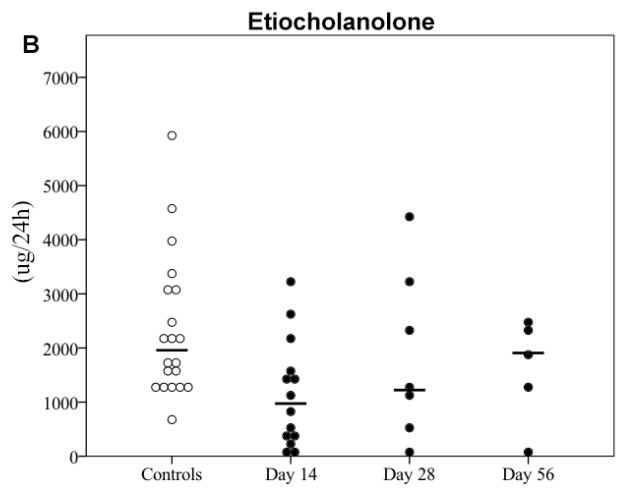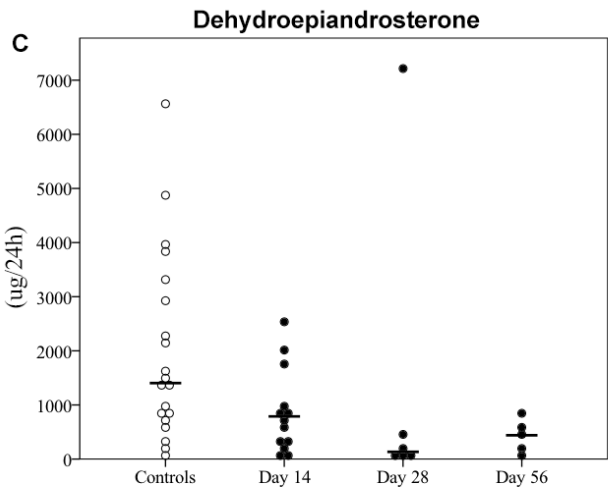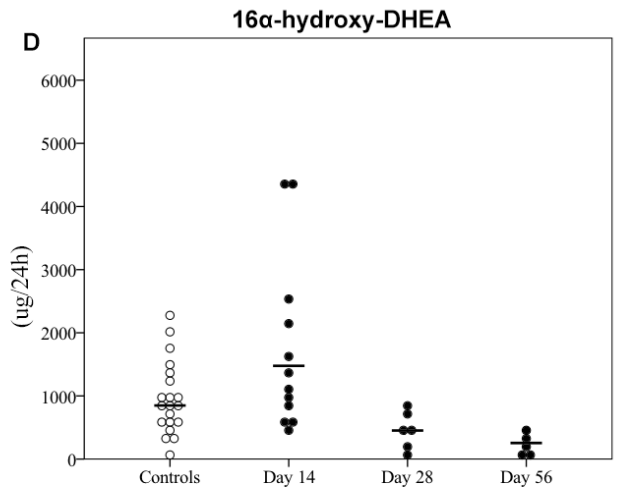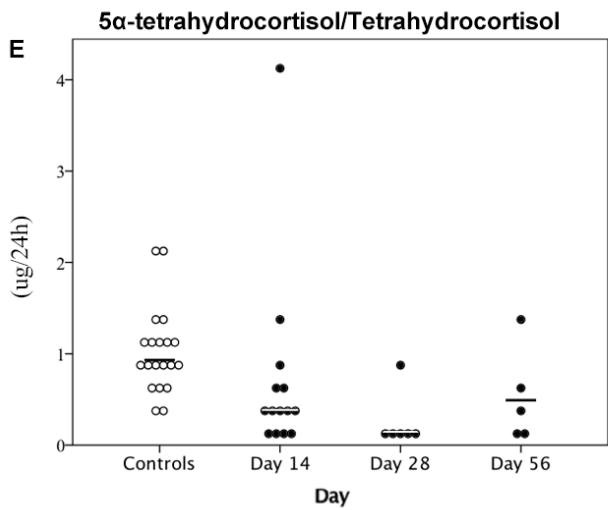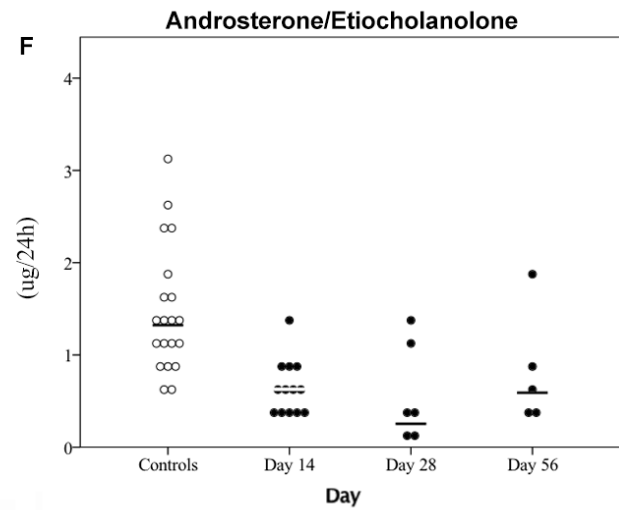

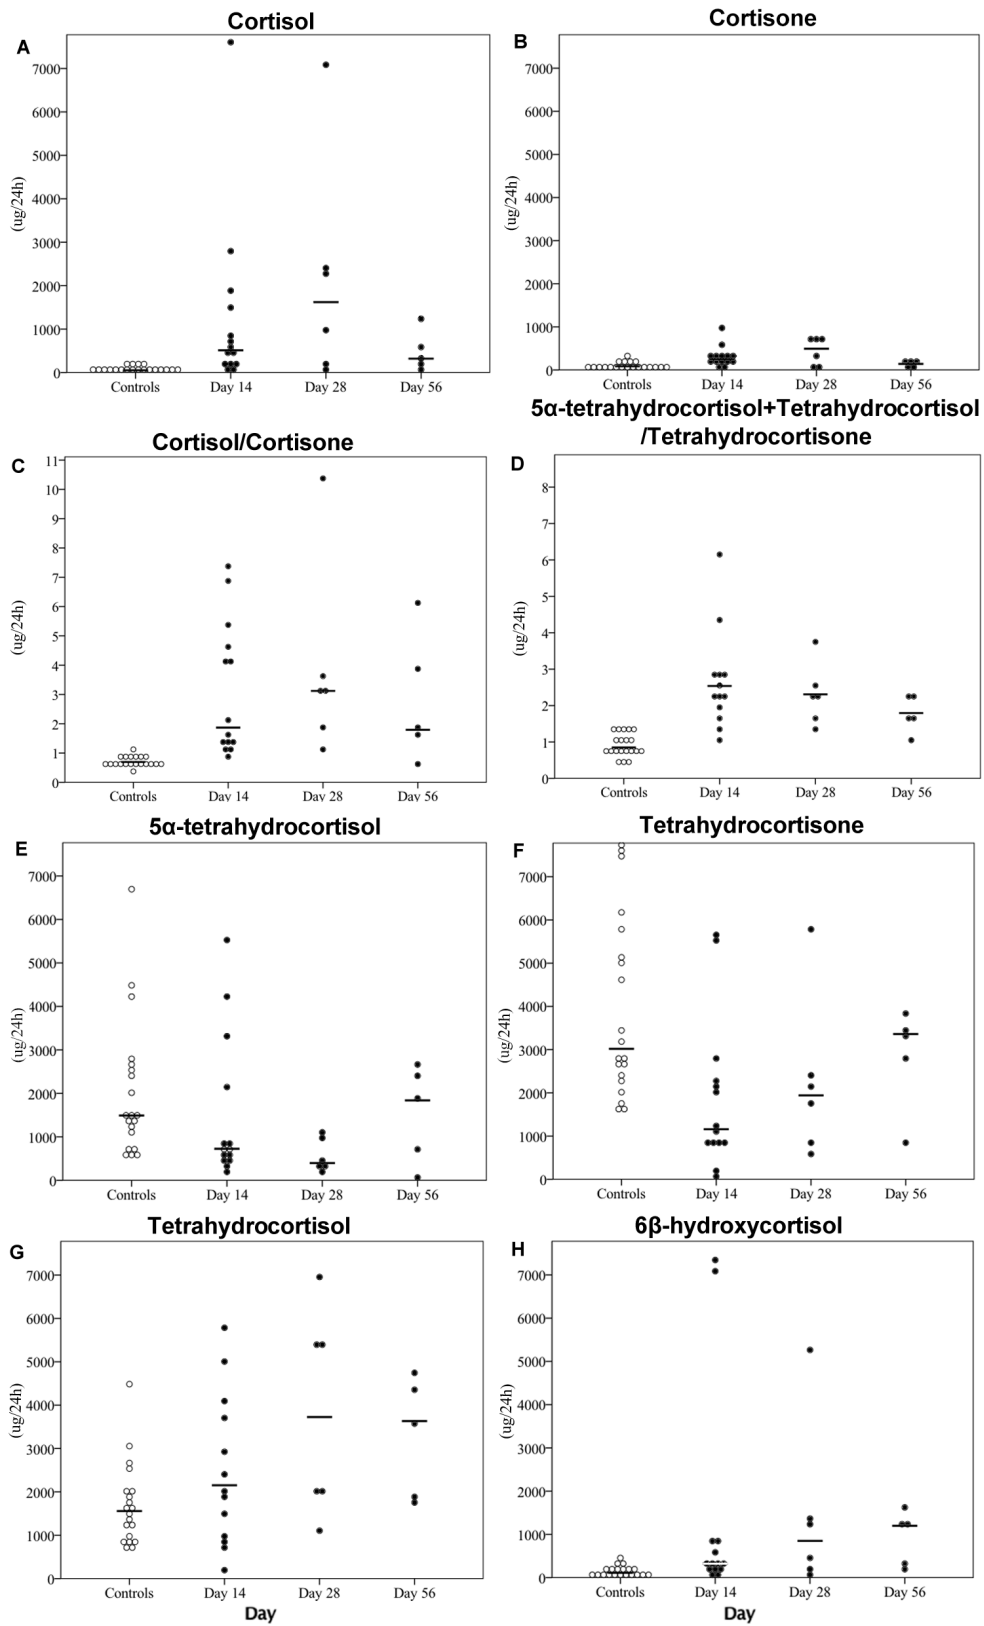

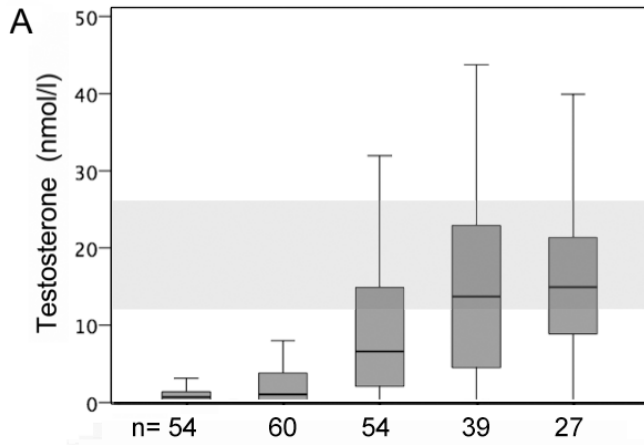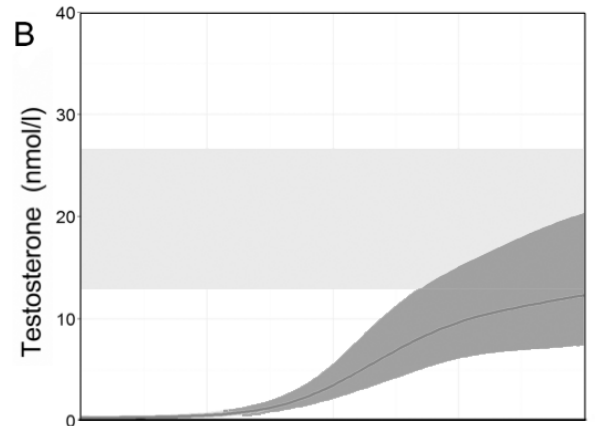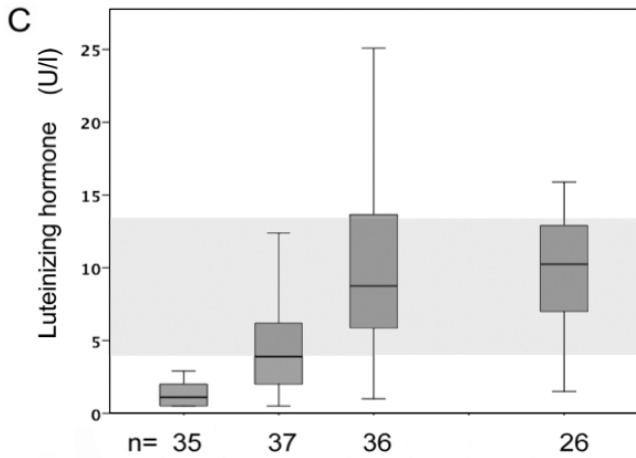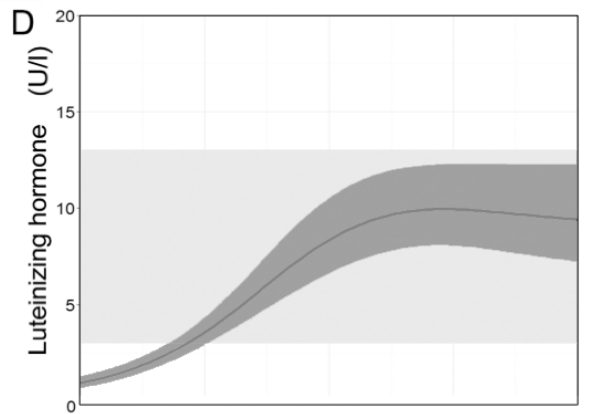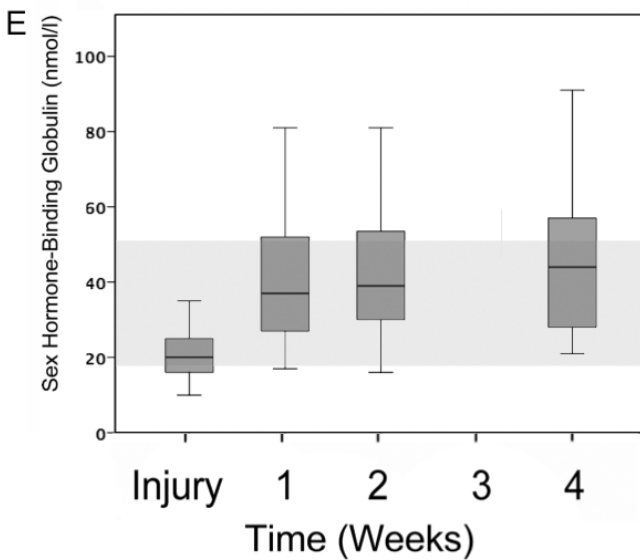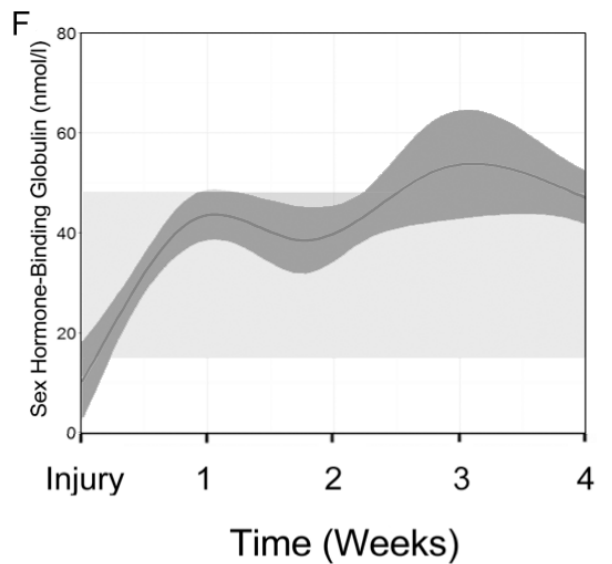



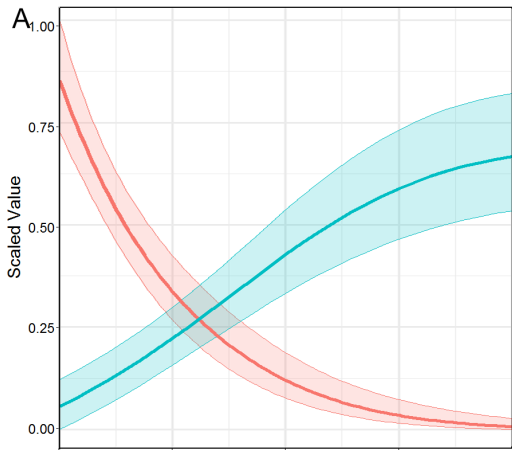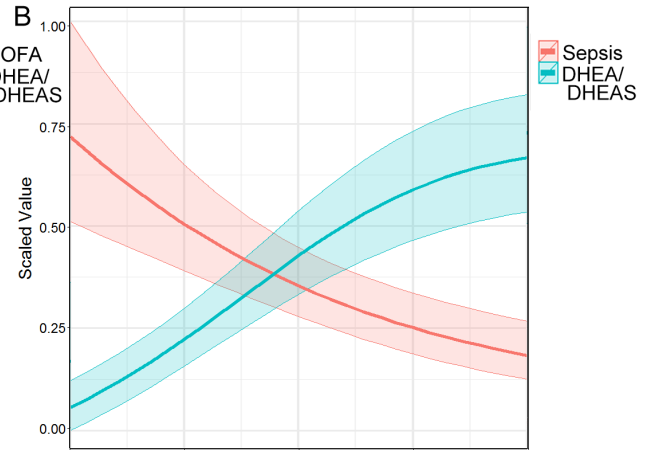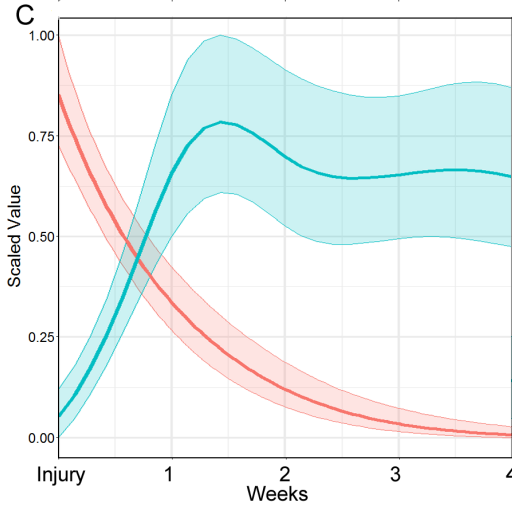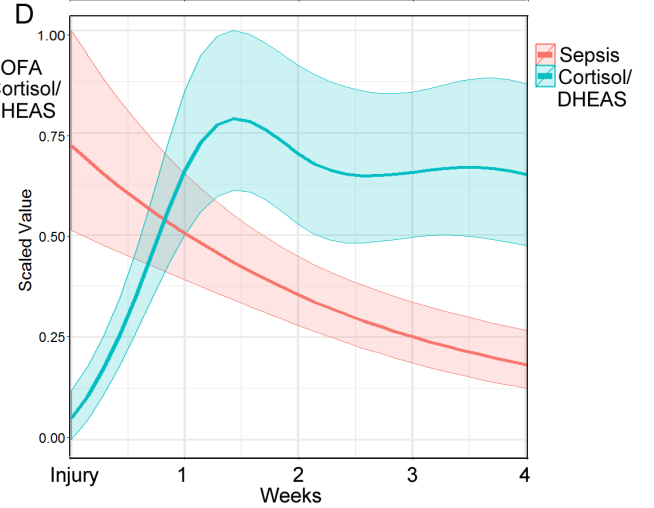

**Suppl. Table 1. Longitudinal Studies in critically ill patients analysing DHEA and DHEAS.**

| Author             | Year | Population                                                                                                       | Measurements                                                                                                              | Comparison                                                              | Outcome                                                                                                                                                                                       |
|--------------------|------|------------------------------------------------------------------------------------------------------------------|---------------------------------------------------------------------------------------------------------------------------|-------------------------------------------------------------------------|-----------------------------------------------------------------------------------------------------------------------------------------------------------------------------------------------|
| Kolditz (38)       | 2010 | 59 patients hospitalized pneumonia                                                                               | CRP, IL6, TNFa, cortisol baseline and after simulation, ACTH, DHEA, DHEAS on the morning of hospital admission            | Clinically stable on day 4 vs clinically unstable on day 4              | DHEA/DHEAS ratio was significantly different – higher in stable patients (ratio of 11 vs 7)                                                                                                   |
| Sharshar (39)      | 2010 | 103 ventilated ICU patients                                                                                      | IGF, prolactin, TSH, FSH ,LH, estradiol, testosterone, DHEA, DHEAS, cortisol on day 1 when 7 days after wakening          | Correlation to SAPSII F vs M                                            | SAPS II assessed at awakening was inversely correlated with plasma levels of DHEA                                                                                                             |
| Klouche(40)        | 2007 | 36 ICU patients with critical illness, severe sepsis or septic shock                                             | 24h after admission, samples at 0800hrs for cortisol, ACTH, and DHEAS                                                     | Elderly vs nonelderly                                                   | DHEAS 0.52 nmol/l vs 0.93 in >75 year old vs <75 years old                                                                                                                                    |
| Chinga-Alayo(41)   | 2005 | 113 ICU patients                                                                                                 | First hour after admission to ICU – cortisol, thyrotropin, t3, t4, cortisol, prolactin, GH, DHEA                          | 88 Survivors vs 25 non-survivors                                        | No difference in DHEA ( 86 vs 73 µg/dl)                                                                                                                                                       |
| Butcher(42)        | 2005 | 35 elderly and 9 young patients with hip fracture undergoing surgery                                             | serum adrenal stress hormones DHEAS and cortisol immediately following injury                                             | Young vs elderly                                                        | DHEAS was higher young trauma group ( $6.29 \pm 2.41 \mu M$ ) compared with elderly hip fracture patients ( $1.82 \pm 1.58 \mu M$ ).                                                          |
| Beishuizen(43)     | 2002 | 30 patients with septic shock, 8 with multiple trauma, and 40 controls                                           | serial measurements of DHEAS , cortisol, TNFa, IL-6, and ACTH over 14 days or until death.                                | Septic shock vs multiple trauma vs controls, Survivors vs non-survivors | DHEAS was lower in septic shock than trauma, both lower control. DHEAS -ve correlation with age, IL-6 and APACHE II scores in both patient groups. DHEAS lower in non-survivors.              |
| Sharshar(44)       | 2011 | 102 patients in ICU who regained consciousness after 7 days ventilation                                          | IGF-1, prolactin, TSH, FSH, LH, estradiol, progesterone, test-, DHEA, DHEAS, cortisol 1 <sup>st</sup> day awake           | Survivors vs non-survivors                                              | DHEA and DHEAS were different in men but not in women (lower in non-survivors).                                                                                                               |
| Van den Berghe(45) | 2002 | 33 men long critical illness and age 50, BMI - controls. RCT 5 days of GHRP-2, GHRP2 + TRH infusion or pulsatile | IGF-I, IGFbPs, thyroid hormones, gonadal and adrenal steroids, proinflammatory, metabolic and inflammation markers daily. | Comparison between different therapies                                  | Neither of the foregoing adrenal steroids was altered by any of the study drugs. Replacement requires replacement of somatotrophic, thyrotrophic and gonadotrophic axes to reduce catabolism. |
| Spratt(46)         | 1993 | postmenopausal women; 20 with acute critical illness vs 110 healthy controls                                     | Day 1-5 DHEA, DHEAS, androstenedione, testosterone, estrogen, gonadotropins, cortisol                                     | Patients vs controls                                                    | Admission levels of DHEA and DHEAS were not elevated in patients. Serum DHEA decreased by day 5 in with gonadotropins                                                                         |
| Gottschlich(47)    | 2009 | 40 patients age 3–18 %TBSA 50.1 were randomly assigned to zolpidem or haloperidol.                               | 2 week study; epinephrine, norepi-, GH, melatonin, DHEA, serotonin, cortisol -0600hrs each study day.                     | Therapy 1 vs 2                                                          | Both drugs were associated with increased DHEA levels (P < .03); no other hormones were affected by medication .                                                                              |

|                    |      |                                                                                                                             |                                                                                                                                                     |                                                                                  |                                                                                                                                                                                                                                                               |
|--------------------|------|-----------------------------------------------------------------------------------------------------------------------------|-----------------------------------------------------------------------------------------------------------------------------------------------------|----------------------------------------------------------------------------------|---------------------------------------------------------------------------------------------------------------------------------------------------------------------------------------------------------------------------------------------------------------|
| Arlt (48)          | 2006 | cross-sectional study consisting of 181 patients with septic shock, 31 patients with acute trauma, and 60 healthy controls. | cortisol, DHEA, and DHEAS were measured before and 60 min after ACTH stimulation.                                                                   | Septic shock vs acute trauma vs healthy controls                                 | DHEAS lower in septic shock & trauma compared to controls, DHEA was increased in sepsis, decreased in trauma. Sepsis; cortisol and DHEA not increased after ACTH. Most severely ill higher cortisol:DHEA. Cortisol:DHEA increased non-survivors septic shock. |
| Mueller (49)       | 2014 | 179 patients hospitalized with community acquired pneumonia.                                                                | DHEA, DHEAS, cortisol                                                                                                                               | Correlation to PSI score                                                         | Correlation between PSI score and DHEAS, cortisol/DHEA, cortisol/DHEAS and DHEA/DHEAS. In age, gender adjusted analysis, DHEA but not DHEAS associated with all-cause mortality.                                                                              |
| Ven den Berghe(50) | 1995 | 20 critically ill polytrauma receiving dopamine were studied to evaluate dopamine withdrawal                                | DHEAS, prolactin, cortisol during dopamine infusion                                                                                                 | Dopamine withdrawal vs continued dopamine                                        | Withdrawal of dopamine 25% increase DHEAS within 24hrs, not DHEAS levels when dopa- continued 2x nights. Prolactin undetectable dopa- infused, increased after 24 hrs of withdrawal.                                                                          |
| Dimopoulou (51)    | 2007 | 203 severely ill -trauma(93), medical(57), or surgical (53).                                                                | 24h of admission ICU AM sample to measure cortisol, ACTH and DHEAS.                                                                                 | 149 survivors and 54 nonsurvivors                                                | Nonsurvivors had a lower incremental rise in DHEAS (1065 vs. 1642 ng/ml) than survivors.                                                                                                                                                                      |
| Osorio(52)         | 2002 | 38 patients scheduled for cholecystectomy                                                                                   | DHEAS, ACTH, cortisol, hGH, IGF-1, and IGFBP-3 preop, and then 2 and 7 days after surgery.                                                          | Preop to day 2 to day 7 after surgery                                            | Reduction in DHEAS on days 2 and 7 after surgery versus the preop values .                                                                                                                                                                                    |
| Almoosa(53)        | 2014 | 30 men ventilated for >24 hrs for acute respiratory failure.                                                                | Blood samples on ICU day 1 and day 3, serum testosterone.                                                                                           | Day 1 and 3 levels, compared to reference                                        | DHEAS levels normal. Total and free testosterone correlated inversely ventilator days and ICU LOS.                                                                                                                                                            |
| Dolecek (54)       | 2006 | 29 polytraumas and 28 burned patients (evaluated by their Burn Index, BI) were followed                                     | Bone markers , iPTH, calcium, inorg PO4- , 25OH vit. D3, testosterone, DHT, free test- , cortisol, 17β estradiol, DHEAS, TNFα, cytokines.           | days 1-7-14-28, of the burned at 1-7-14-28-56, as well as after 6 and 12 months. | All androgens (T, DHT, FT) decreased significantly in the males, DHEAS decreased in male and females.                                                                                                                                                         |
| Dossett(55)        | 2008 | 991 injured patients remaining in the ICU for at least 48 hours                                                             | Sex hormones (estradiol, progesterone, testosterone, prolactin, and DHEAS)                                                                          | Survivors vs non-survivors                                                       | Estradiol elevated in nonsurvivors . Estradiol most severely injured had highest. Progesterone, test-, DHEA-S were higher in nonsurvivors; ability to accurately predict death lower than estradiol .                                                         |
| Folan(56)          | 2001 | 191 men and women in ICU                                                                                                    | DHEA, DHEA-S, and cortisol within 24 hrs of admission and compared with admission APACHE II scores.                                                 | APACHE 2 scores and Surgical(SICU) and Medical ICU                               | The correlations between APACHE II scores and DHEA data for women in the ICU correlation between APACHE II and DHEAS women in SICU.                                                                                                                           |
| Ilias (57)         | 2007 | 83 men and 11 women with multiple trauma                                                                                    | TSH, fT4, T3, ACTH, prolactin, cortisol and DHEAS.                                                                                                  | Survivors vs non-survivors                                                       | ACTH and DHEAS higher survivors. APACHE II and Cortisol post-Synacthen, DHEAS, TSH*age assessed survival/non-survival better than APACHE II, SOFA or IS scores alone.                                                                                         |
| Brorsson(58)       | 2014 | 50 trauma patients admitted to a level-1-trauma centre                                                                      | Serum & saliva cortisol from injury to five days after trauma. CBG, DHEA & DHEAS twice 5 days after trauma.                                         | Temporal change                                                                  | A significant decrease over time was observed in DHEA, and DHEAS.                                                                                                                                                                                             |
| Bergquist (59)     | 2016 | 16 adult male patients with burn injury (14.5–72%TBSA )                                                                     | Plasma cortisol, cortisone, corticosterone, 11-deoxycortisol, DHEA, androstenedione, test-, pregnenolone, , estrone and estradiol and progesterone. | Changes 0, 1, 3, 7, 14, 21 days post burn                                        | Burn injury alters endogenous steroid biosynthesis, reduce testosterone and DHEA levels to 3 weeks and elevated estrone concentrations post injury. Concentrations of glucocorticoids, progestagens and androgen precursors correlated positively TBSA.       |

## Supplemental References

1. **Kolditz M, Halank M, Schulte-Hubbert B, Hoffken G.** Adrenal function is related to prognosis in moderate community-acquired pneumonia. *Eur. Respir. J.* 2010;36(3):615–621. doi:10.1183/09031936.00191709.
2. **Sharshar T, Bastuji-Garin S, De Jonghe B, Stevens RD, Polito A, Maxime V, Rodriguez P, Cerf C, Outin H, Touraine P, Laborde K.** Hormonal status and ICU-acquired paresis in critically ill patients. *Intensive Care Med* 2010;36(8):1318–1326. doi:10.1007/s00134-010-1840-6.
3. **Klouche K, Da Mota EF, Durant R, Amigues L, Corne P, Jonquet O, Beraud JJ.** Hypothalamic-pituitary-adrenal axis reactivity and dehydroepiandrosterone sulfate plasma concentrations in the critically ill elderly. *Age Ageing* 2007;36(6):686–689. doi:10.1093/ageing/afm113.
4. **Chinga-Alayo E, Villena J, Evans AT, Zimic M.** Thyroid hormone levels improve the prediction of mortality among patients admitted to the intensive care unit. *Intensive Care Med* 2005;31(10):1356–1361. doi:10.1007/s00134-005-2719-9.
5. **Butcher SK, Killampalli V, Lascelles D, Wang K, Alpar EK, Lord JM.** Raised cortisol:DHEAS ratios in the elderly after injury: potential impact upon neutrophil function and immunity. *Aging Cell* 2005;4(6):319–324. doi:10.1111/j.1474-9726.2005.00178.x.
6. **Beishuizen A, Thijs LG, Vermes I.** Decreased levels of dehydroepiandrosterone sulphate in severe critical illness: a sign of exhausted adrenal reserve? *Crit Care* 2002;6(5):434–438.
7. **Sharshar T, Bastuji-Garin S, Polito A, De Jonghe B, Stevens RD, Maxime V, Rodriguez P, Cerf C, Outin H, Touraine P, Laborde K.** Hormonal status in protracted critical illness and in-hospital mortality. *Crit Care* 2011;15(1):R47. doi:10.1186/cc10010.
8. **Van den Berghe G, Baxter RC, Weekers F, Wouters P, Bowers CY, Iranmanesh A, Veldhuis JD, Bouillon R.** The combined administration of GH-releasing peptide-2 (GHRP-2), TRH and GnRH to men with prolonged critical illness evokes superior endocrine and metabolic effects compared to treatment with GHRP-2 alone. *Clin Endocrinol* 2002;56(5):655–669.
9. **Spratt DI, Longcope C, Cox PM, Bigos ST, Wilbur-Welling C.** Differential changes in serum concentrations of androgens and estrogens (in relation with cortisol) in postmenopausal women with acute illness. *J Clin Endocrinol Metab* 1993;76(6):1542–1547. doi:10.1210/jcem.76.6.8501162.
10. **Gottschlich MM, Khoury J, Warden GD, Kagan RJ.** An evaluation of the neuroendocrine response to sleep in pediatric burn patients. *JPEN J Parenter Enteral Nutr* 2009;33(3):317–326. doi:10.1177/0148607108325180.
11. **Arlt W, Hammer F, Sanning P, Butcher SK, Lord JM, Allolio B, Annane D, Stewart PM.** Dissociation of serum dehydroepiandrosterone and dehydroepiandrosterone sulfate in septic shock. *Journal of Clinical Endocrinology & Metabolism* 2006;91(7):2548–2554. doi:10.1210/jc.2005-2258.
12. **Mueller C, Blum CA, Trummler M, Stolz D, Bingisser R, Mueller C, Tamm M, Mueller B, Schuetz P, Christ-Crain M.** Association of adrenal function and disease severity in community-acquired pneumonia. Yende S, ed. *PLoS ONE* 2014;9(6):e99518–6. doi:10.1371/journal.pone.0099518.

13. **Van den Berghe G, de Zegher F, Wouters P, Schetz M, Verwaest C, Ferdinande P, Lauwers P.** Dehydroepiandrosterone sulphate in critical illness: effect of dopamine. *Clin Endocrinol* 1995;43(4):457–463. doi:10.1111/j.1365-2265.1995.tb02618.x.
14. **Dimopoulou I, Stamoulis K, Ilias I, Tzanela M, Lyberopoulos P, Orfanos S, Armaganidis A, Theodorakopoulou M, Tsagarakis S.** A prospective study on adrenal cortex responses and outcome prediction in acute critical illness: results from a large cohort of 203 mixed ICU patients. *Intensive Care Med* 2007;33(12):2116–2121. doi:10.1007/s00134-007-0790-0.
15. **Osorio A, Vara-Thorbeck R, Rosell J, Osorio C, Ortega E, Ruiz-Requena E.** Dehydroepiandrosterone sulfate and growth axis hormones in patients after surgery. *World J Surg* 2002;26(9):1079–1082. doi:10.1007/s00268-002-6368-7.
16. **Almoosa KF, Gupta A, Pedroza C, Watts NB.** Low Testosterone Levels are Frequent in Patients with Acute Respiratory Failure and are Associated with Poor Outcomes. *Endocrine Practice* 2014;20(10):1057–1063. doi:10.4158/EP14003.OR.
17. **Dolecek R.** Markers of bone remodelling, bone density and endocrine response after polytraumas and burns. *OSTEOLOGICK BULLETIN* 2008;11(1):5–22.
18. **Dossett LA, Swenson BR, Heffernan D, Bonatti H, Metzger R, Sawyer RG, May AK.** High Levels of Endogenous Estrogens are Associated With Death in the Critically Injured Adult. *J Trauma* 2008;64(3):580–585. doi:10.1097/TA.0b013e31816543dd.
19. **Folan MM, Stone RA, Pittenger AL, Stoffel JA, Hess MM, Kroboth PD.** Dehydroepiandrosterone, dehydroepiandrosterone-sulfate, and cortisol concentrations in intensive care unit patients. *Crit Care Med* 2001;29(5):965–970.
20. **Ilias I, Stamoulis K, Armaganidis A, Lyberopoulos P, Tzanela M, Orfanos S, Theodorakopoulou M, Tsagarakis S, Dimopoulou I.** Contribution of endocrine parameters in predicting outcome of multiple trauma patients in an intensive care unit. *Hormones (Athens)* 2007;6(3):218–226.
21. **Brorsson C, Dahlqvist P, Nilsson L, Thunberg J, Sylvan A, Naredi S.** Adrenal response after trauma is affected by time after trauma and sedative/analgesic drugs. *Injury* 2014;45(8):1149–1155. doi:10.1016/j.injury.2014.02.001.
22. **Bergquist M, Huss F, Fredén F, Mass GHC, 2016.** Altered adrenal and gonadal steroids biosynthesis in patients with burn injury. *Clinical Mass Spectrometry* 2016;1:19–26. doi:10.1016/j.clinms.2016.10.002.
